# Supplementary material for: Identification of a physiologic vasculogenic fibroblast state to achieve tissue repair
Source: Springer Nature journal article supplement (doi:10.1038/s41467-023-36665-z), 2023-02-28
Supplement: MOESM1 [file 41467_2023_36665_MOESM1_ESM.pdf]

# **Identification of a physiologic vasculogenic fibroblast state to achieve tissue repair**

## **Data Supplement**

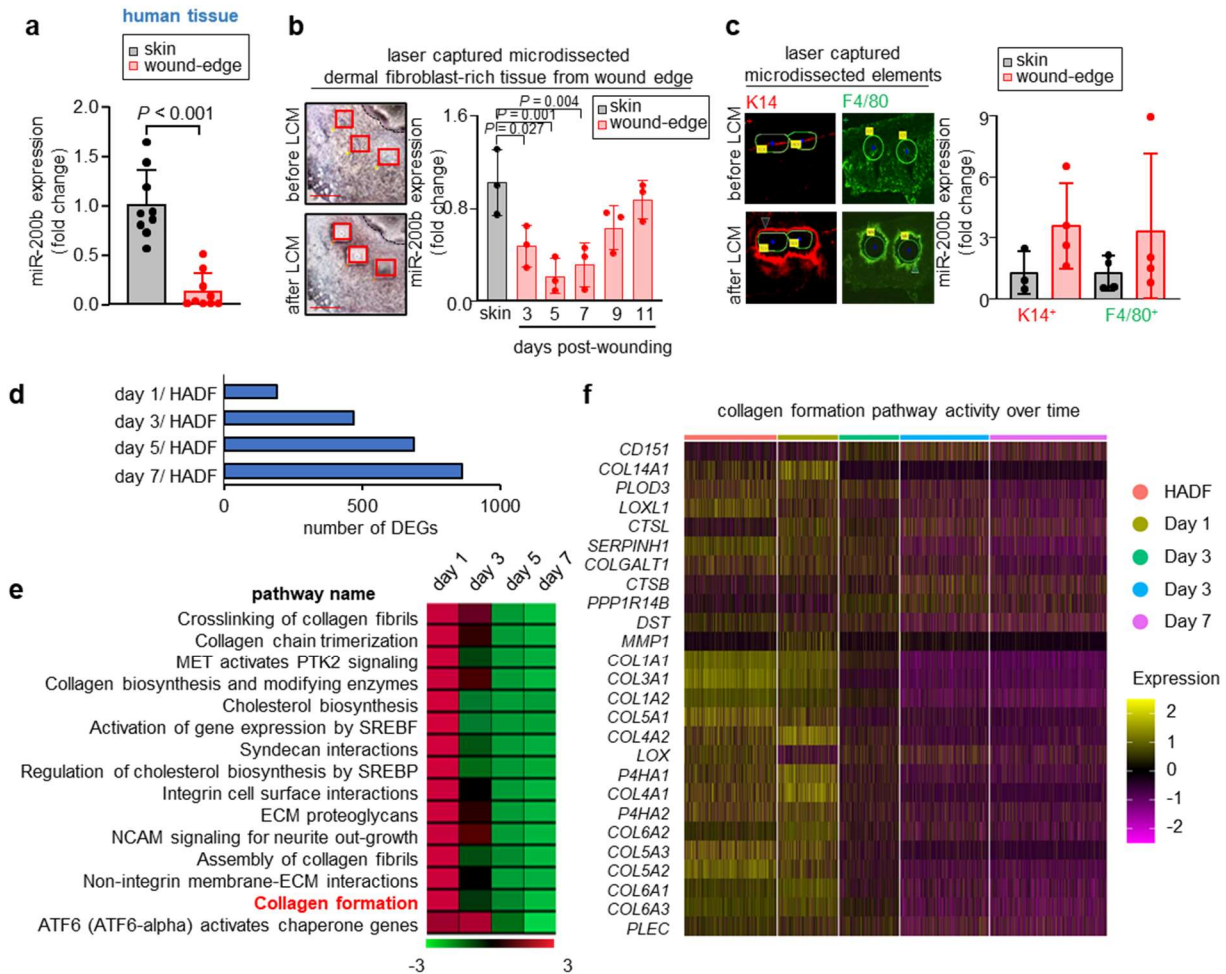

**Supplementary Fig. 1 | Direct reprogramming of dermal fibroblasts to endothelial cells by anti-miR200b oligonucleotide. Related to Figure 1.** a) miR-200b expression in human skin and wound-edge tissue. Results represent mean  $\pm$  S.D. (n = 9). b) miR-200b expression in dermal fibroblast-rich skin and wound-edge tissue of C57BL/6 mice collected by Laser Captured Microdissection (LCM) at different days post-wounding. Results represent mean  $\pm$  S.D. (n = 3). c) miR-200b expression in K14<sup>+</sup> (left) and F4/80<sup>+</sup> (right) laser captured microdissected elements from skin and d5 wound-edge tissue of C57BL/6 mice. Results represent mean  $\pm$  S.D. (n = 3- 4). d) Bar plot showing increase in the total number of differentially expressed genes with time for each sample post anti-miR-200b treatment at day 1, 3, 5 and 7 in comparison to parent HADF cells. e) Heatmap of the top 15 downregulated pathways at day 7 post anti-miR-200b treatment showed

downregulation of collagen formation pathway. f) Heatmap representing the relative expression of genes which were enriched in the collagen formation pathway in each sample (before and after anti-miR-200b treatment). Columns represent individual cells. Rows represent genes. Data in a, and c were analyzed by two-tailed unpaired Student's t test. Data in b were analyzed by one-way analysis of variance with the *post-hoc* Bonferroni multiple comparison test.

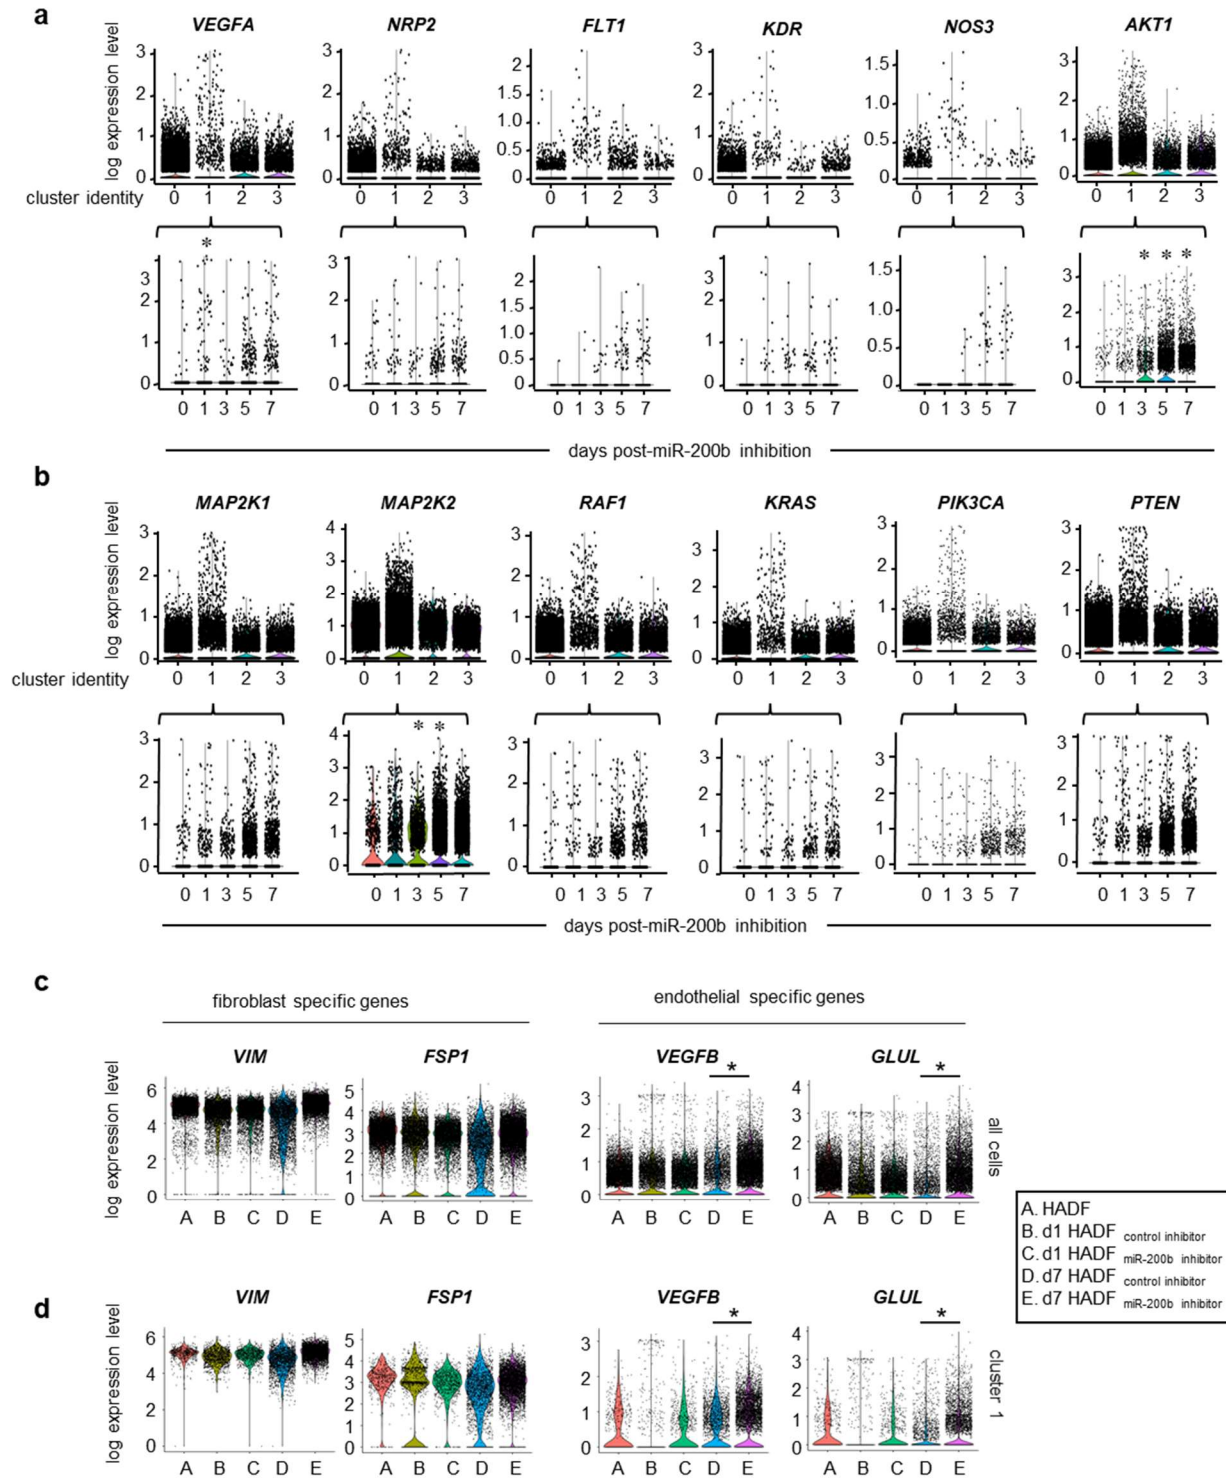

**Supplementary Fig. 2 | Single-cell analysis reveals temporal upregulation of VEGF pathway in certain clusters of vasculogenic fibroblasts post miR-200b inhibition. Related to Figure 1.**

a-b) Violin plots showing expression level of VEGF pathway genes in the 4 main clusters (a) and their expression within cluster 1 cells over time post anti-miR-200b treatment (b). c-d) Violin plots showing expression levels of selected fibroblasts and vasculogenic pathway genes in different samples treated with control inhibitor and miR-200b inhibitor at days 1 and 7 in all cells (c) and in cluster 1 (d). \*  $P < 0.001$  Wilcoxon ranked test.

**a**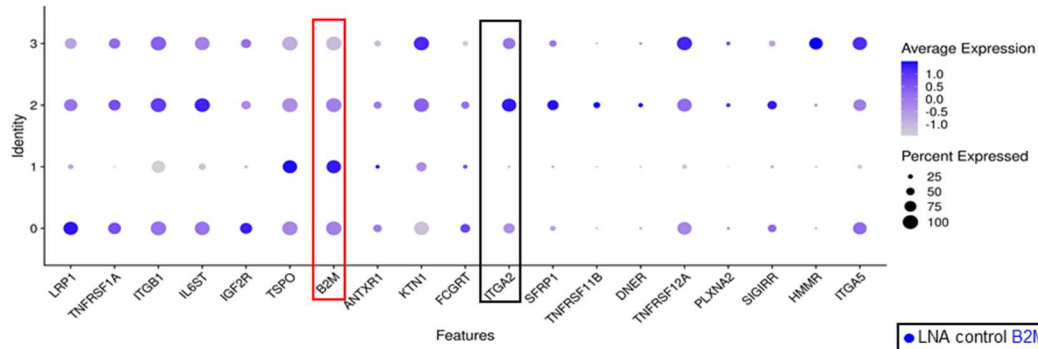**b**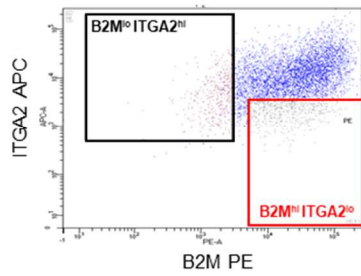**c**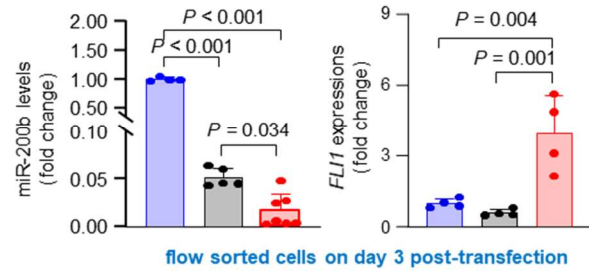**d**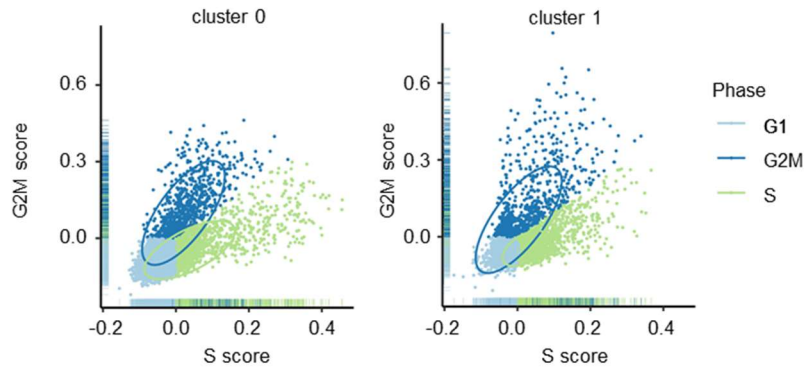**e**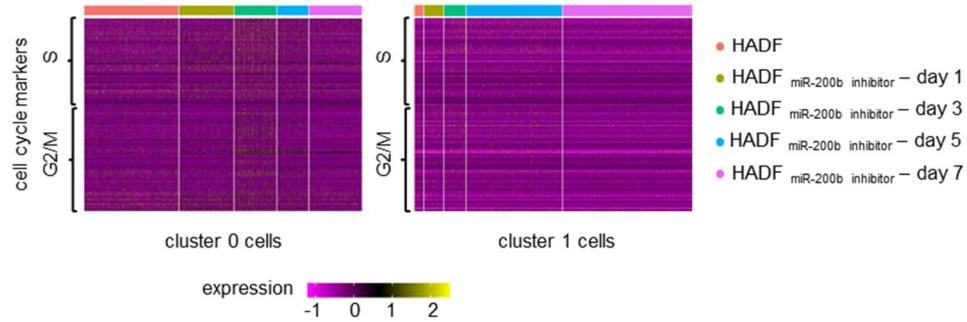

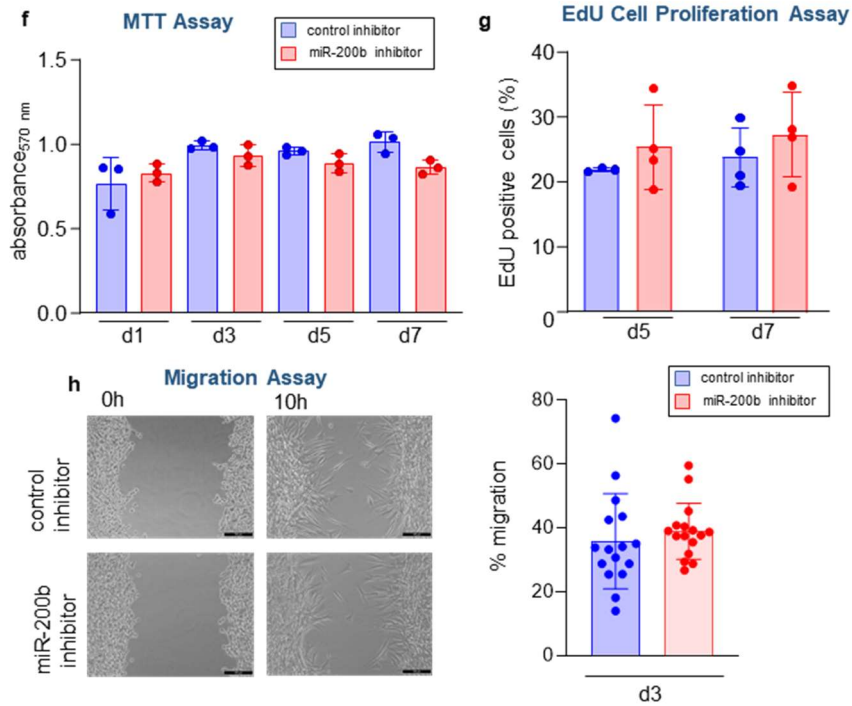

**Supplementary Fig. 3 | Defining clusters 1 and other clusters in vasculogenic fibroblasts.** a) Dot plot representing different plasma membrane proteins specific to clusters post-miR-200b inhibition. b) Flow sorting of cluster 1 ( $B2M^{hi}ITGA2^{lo}$ ) and rest other clusters ( $B2M^{lo}ITGA2^{hi}$ ). c) miR-200b and FLI1 expression in  $B2M^{hi}ITGA2^{lo}$  cells and rest other clusters  $B2M^{lo}ITGA2^{hi}$ . HADF cells treated with control inhibitor were sorted for  $B2M^{lo}ITGA2^{hi}$  served as control. Results represent mean  $\pm$  S.D. (n = 4-7). d) Scatter plots representing cell cycle scores for cluster 0 (left) and cluster 1 cells (right). e) Heatmaps representing expression of cell cycle markers for cluster 0 and cluster 1 over time. f-h) MTT assay (f) and EdU cell proliferation assay (g) and migration assay (h) of HADF transfected with either control inhibitor or miR-200b inhibitor at different time points post- transfection. No significance difference was observed between control inhibitor and miR-200b inhibitor at any time point. Data expressed as mean  $\pm$  S.D. (f: n = 3; g: n = 3-4; h: n = 16), non-parametric student's t test.



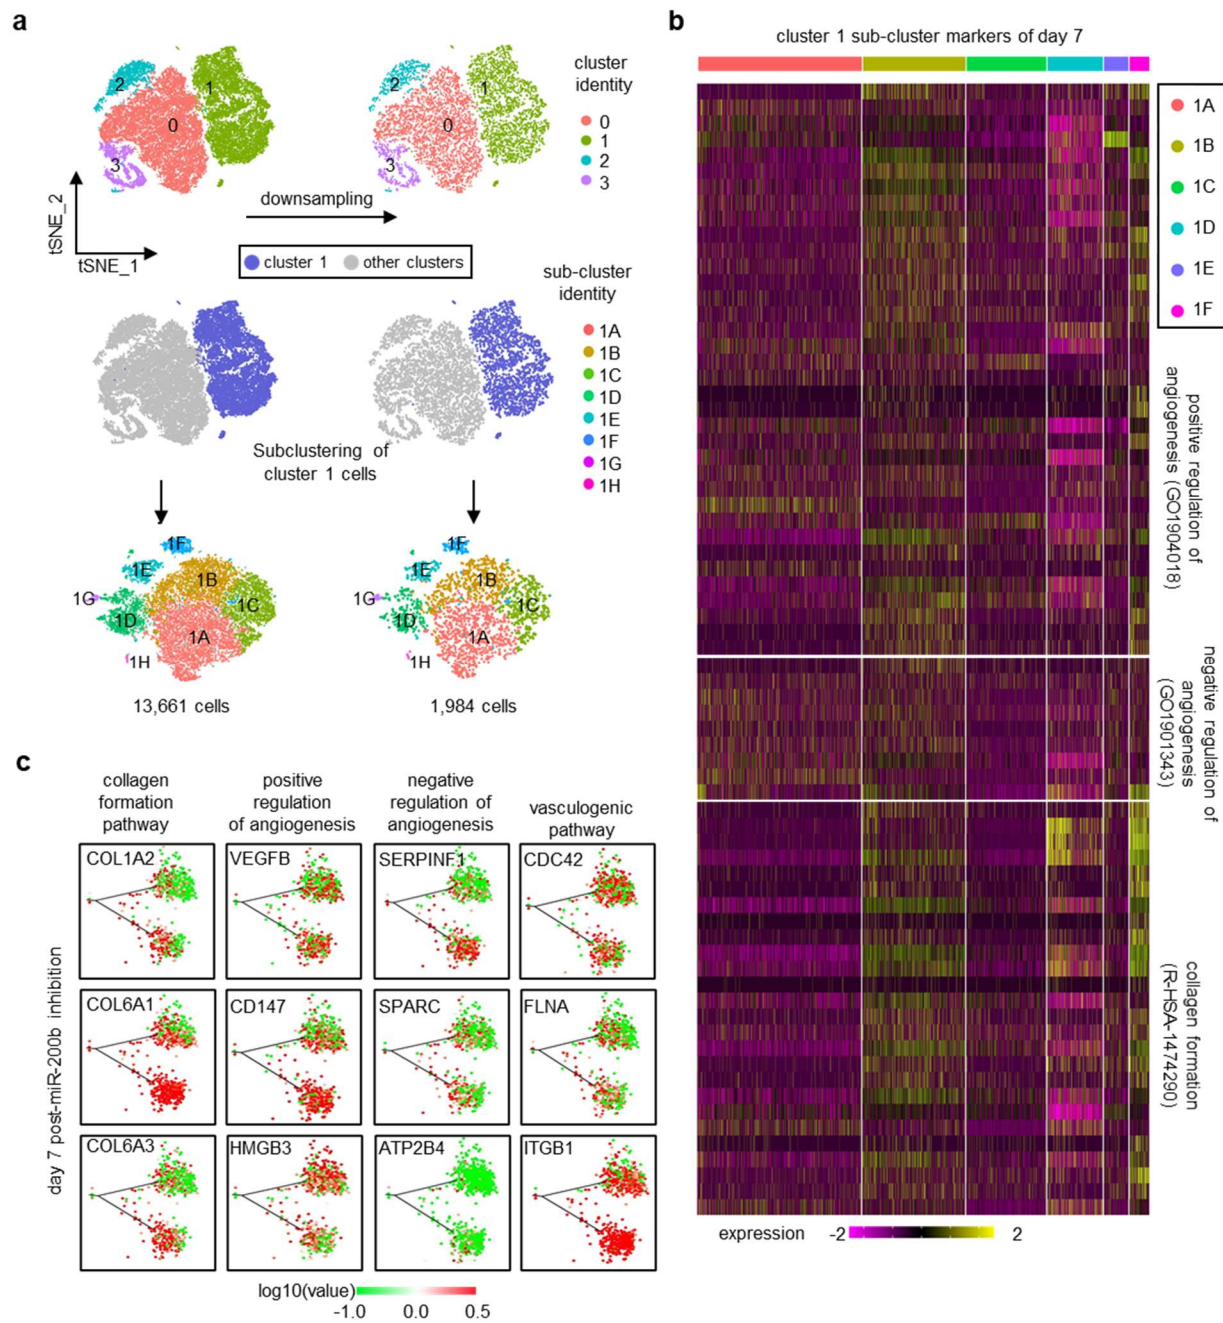



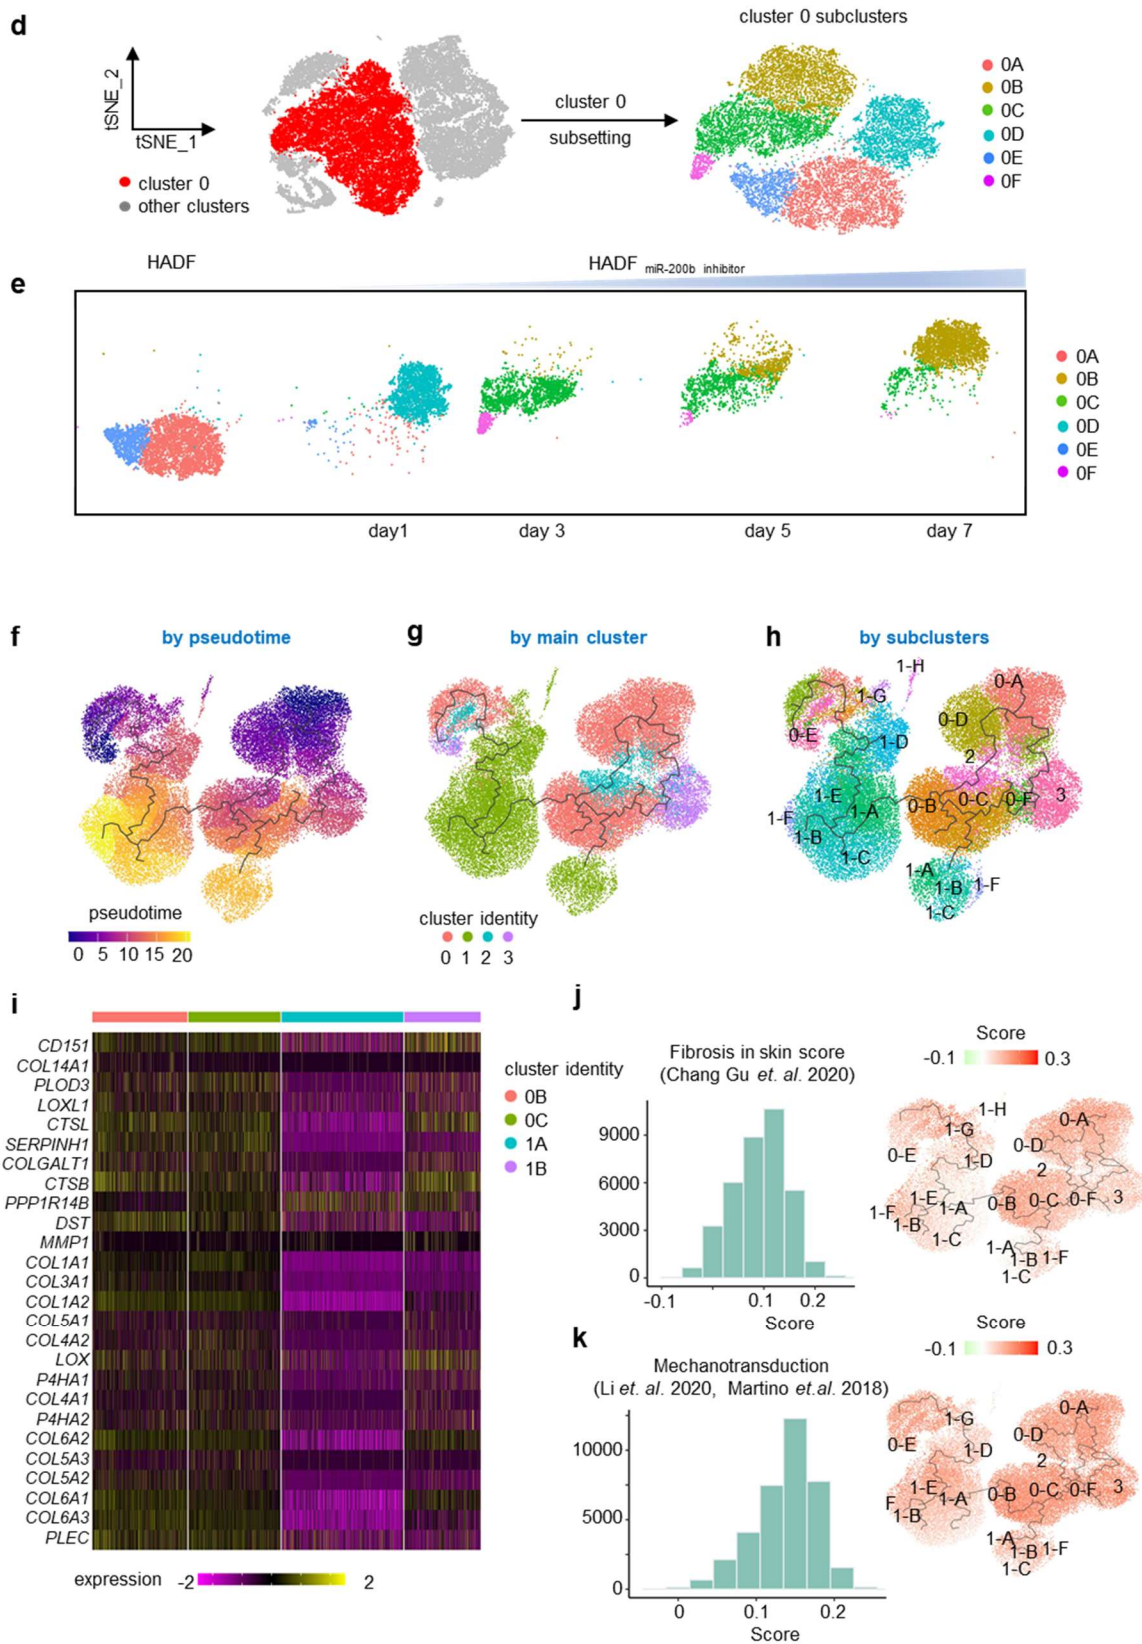

**Supplementary Fig. 4 | More vasculature development genes were identified to be upregulated in subclusters 1B and 1D. Related to Figure 4.** a) Down sampling: to perform the trajectory inference, a subset of cells (right side; 6000 cells) were used from the original 36,308 cells (left side). b) Heatmap showing gene expression dynamics during the fibroblast state transition process identified in cluster 1 subclusters and have role in vasculogenesis regulation (upper and middle panel). Lower panel includes collagen formation pathway genes identified to be downregulated over time (figure SII-C in data supplement). Columns represent individual cells. Rows represent genes. c) Expression level of selected genes from representing collagen formation pathway, positive and negative regulation of angiogenesis, and vasculogenic pathways over the terminal branches of the trajectory. Cells at the bottom of the trajectory were enriched more in collagen formation and anti-angiogenic genes compared to the cells present at the top of the trajectory. d) tSNE plot representing identification and subclustering of cluster. e) tSNE plot representing cluster 0 subclusters in each sample over time. f-h) UMAP plots representing the inferred trajectory using all cells colored by pseudotime (f), main clusters (g) and subclusters (h) respectively. Cluster 0B and 0C can represent the main precursors for cluster 1 population. i) Heatmap representing the relative expression of genes which were enriched in the collagen formation pathway in clusters 0B, 0C, 1A and 1B. Columns represent individual cells. Rows represent genes. j-k) Histograms (left) and UMAP plot representing inferred trajectory (right) representing distribution of calculated scores based on skin fibrosis (j) and mechanotransduction (k) respectively. Cells were colored by their calculated scores.

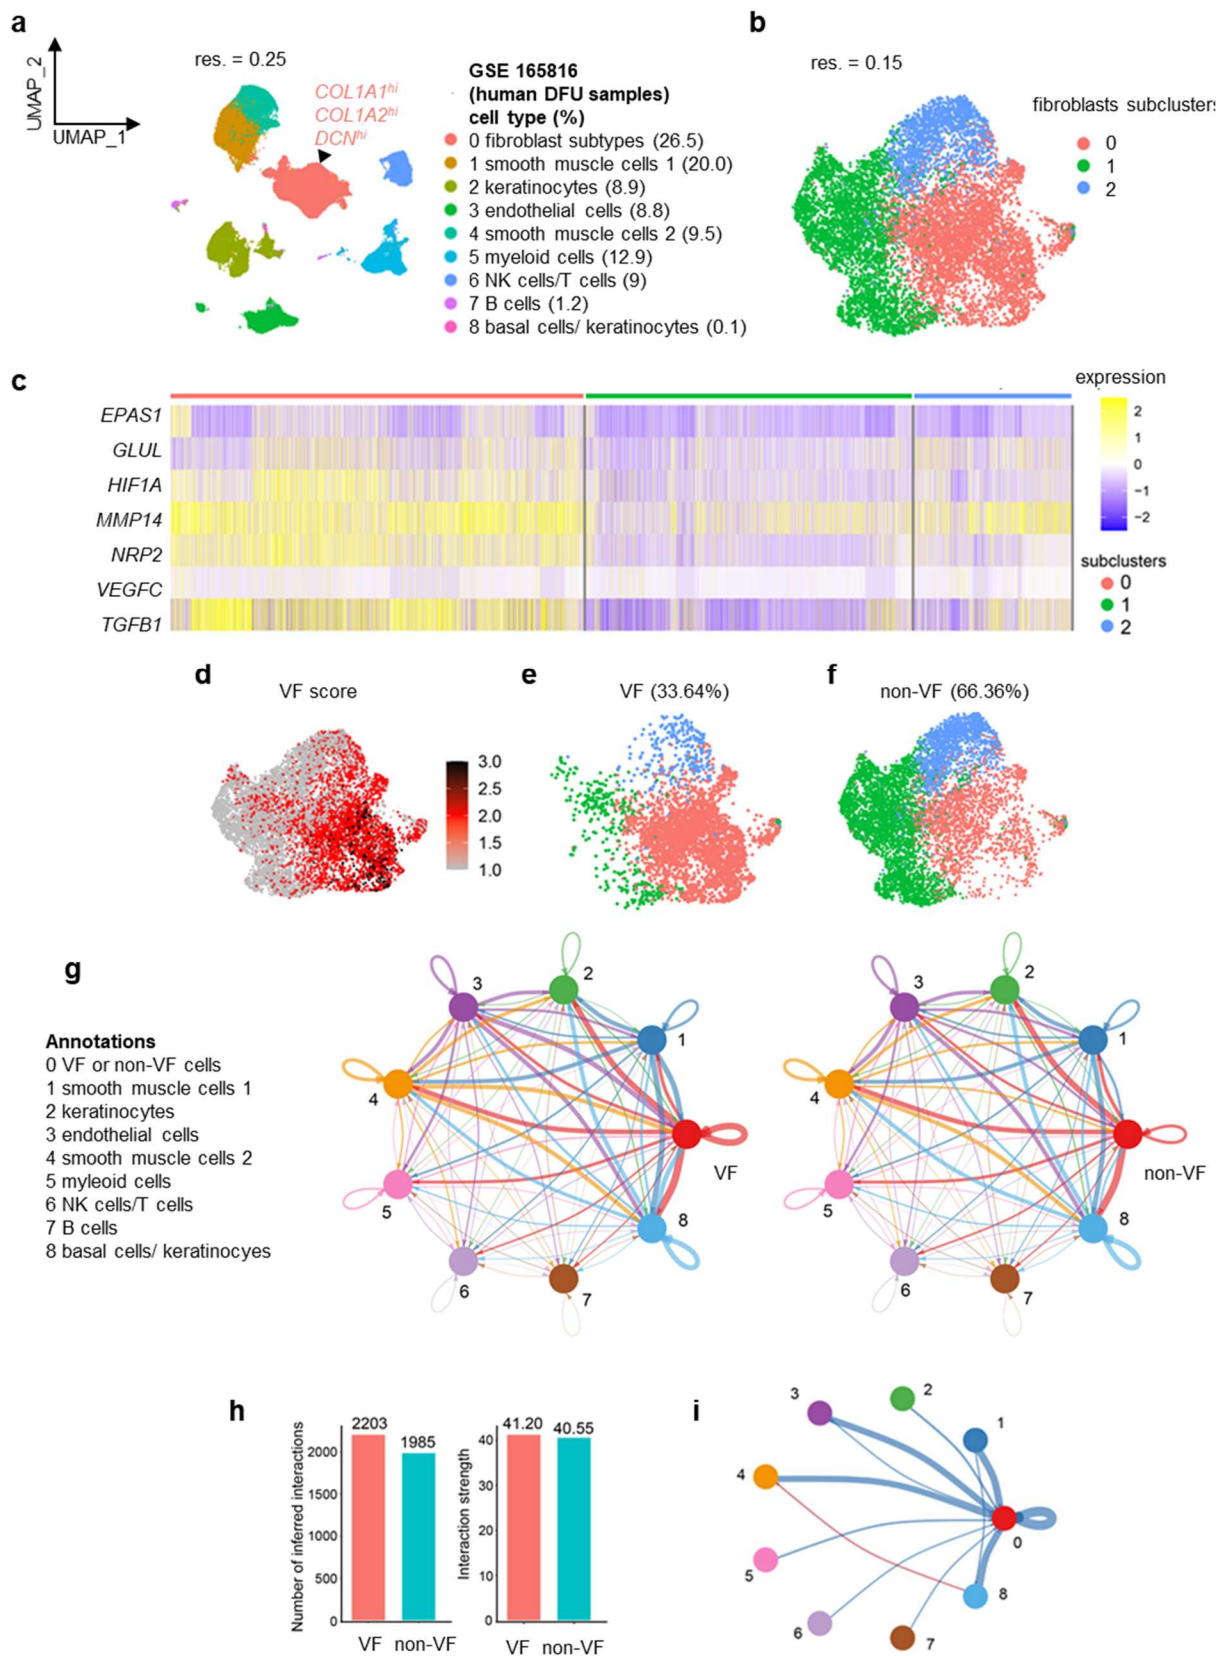

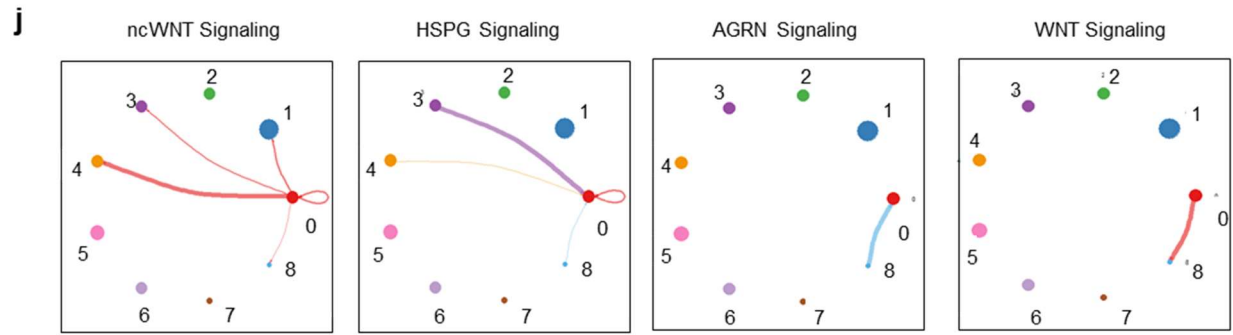

**Supplementary Fig. 5 | Characterization of VF population in DFU samples.** For this work, single-cell RNA seq data of 14 human DFU samples (n=11), were collected from Gene Expression Omnibus (GEO) with accession number GSE165816. All the processed scRNA-seq samples were quality filtered, normalized using ‘SCT-transformation’ and stored as Seurat objects in R. Further, these Seurat objects were integrated, and executed for clustering analysis (with resolution 0.25) using Seurat (a) Resulting cluster of cells were illustrated in UMAP plot, showing the 9 (0-8) clusters with distinct cluster identities. Cell type annotations based on cluster specific markers (from PanglaoDb) along with their abundances were documented. b) Three sub-clusters, identified in the re-clustering analysis of the fibroblast cluster using Seurat (at resolution = 0.10), were illustrated as UMAP plot. (c) Heatmap showing the relative expression of VF signature genes across fibroblast subclusters which were significantly elevated (Student’s t-test, p-value  $\leq 0.01$ , log2 fold change  $> 0.30$ ) in sub-cluster 0 compared to other subclusters. d) Distribution of cells representing the VF score (computed based on significant VF genes) was illustrated in UMAP plot. (e-f) Based on VF score, the fibroblast subclusters were further classified into VF and non-VF cells as shown in respective UMAP plots. g) CellChat derived communication network of VF included connectome and non-VF included connectome were shown as communication network. h) Bar graph showing the total number of interactions and weighted interaction strength of VFS and non-VF included connectome using CellChat package in R. (i) The inferred cell-cell communication networks were compared and differential connectome

of VF over non-VF was illustrated in network plot. j) Top four signaling pathways (ncWNT, HSPG, AGRN and WNT) significantly enriched only in VF (not present in non-VF) included connectome was identified.

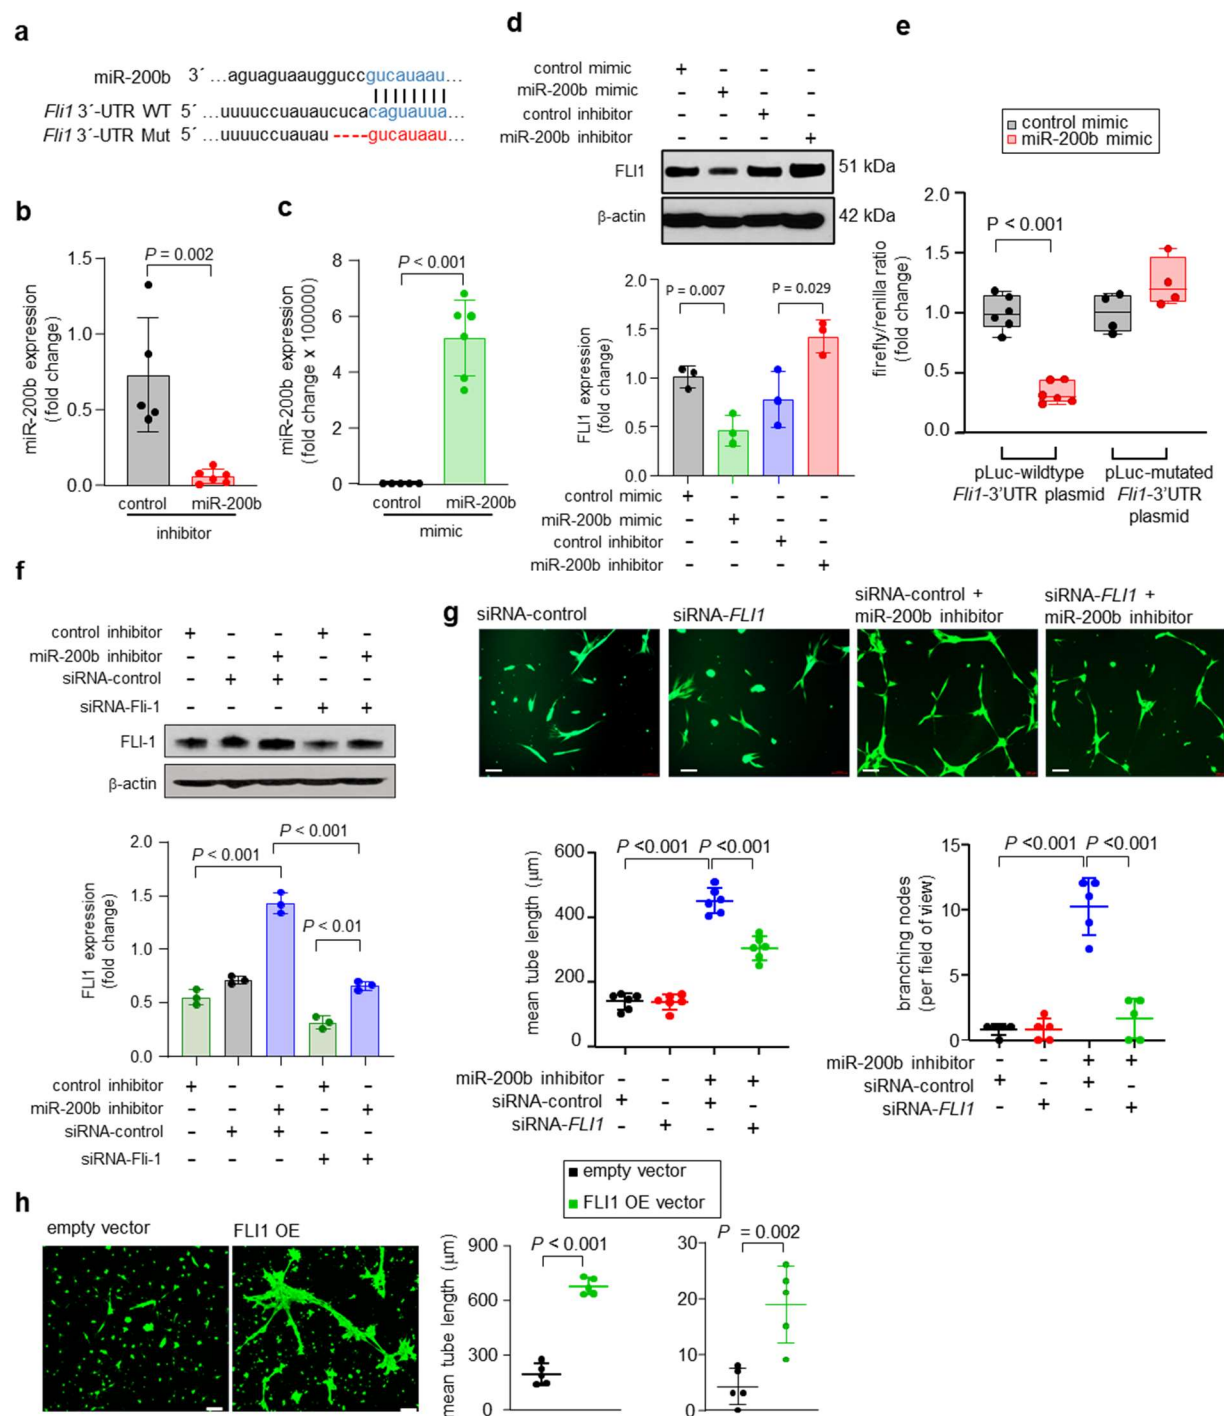



**Supplementary Fig. 6 | miR-200b inhibition in fibroblasts upregulates FLI1 to promote the vasculogenic state.** a) Predicted binding site in FLI1 3'-UTR for hsa-miR-200b as predicted by in silico studies. The mutated seed sequence of FLI1 3'-UTR was shown in red. b) (b-c) miR-200b expression in HADF after delivery of either miR-200b inhibitor (b) or mimic (c). Results represent mean  $\pm$  S.D. (n=6). d) Western blot analysis (top) and densitometric quantification (bottom) of FLI1 in HADFs after transfecting with either miR-200b mimic or inhibitor. b-actin serves as loading control. Data expressed as mean  $\pm$  S.D. (n=3). e) miR target reporter luciferase assay after delivery of miR-200b mimic in HADF transfected with either wild type FLI1 3'-UTR plasmid or mutated FLI1 3'-UTR plasmids. Results were normalized with renilla luciferase activity. Data are mean  $\pm$  S.D. The line represents the mean and the whiskers represent the standard deviation. (n = 6,4). f) Western blot analysis (top) and densitometric quantification (bottom) of FLI1 in HADFs after transfecting with either miR-200b mimic or inhibitor in presence or absence of sh-FLI1 RNA. b-actin serves as loading control. Data expressed as mean  $\pm$  S.D. (n=3). g) Matrigel tube formation (top) at day 7 post-in-vitro TNT of miR-200b inhibitor transfected HADF in presence or absence of control or *FLII* siRNA. Scale, 100 $\mu$ m. Quantification of tube length ( $\mu$ m) and branching nodes of each group was plotted graphically (bottom). Data expressed as mean  $\pm$  S.D.(n=5-6). h) Matrigel™ tube formation (left) at day 7 post-*in vitro* TNT of *FLII* overexpression plasmid. Scale, 100 $\mu$ m. Quantification of tube length ( $\mu$ m) and branching nodes of each group was plotted graphically (bottom). Data expressed as mean  $\pm$  S.D.(n=5). Data in b, c, d and h were analyzed by two-tailed unpaired Student's t test. Data in f and g were analyzed by one-way analysis of variance with the *post-hoc* Bonferroni multiple comparison test.



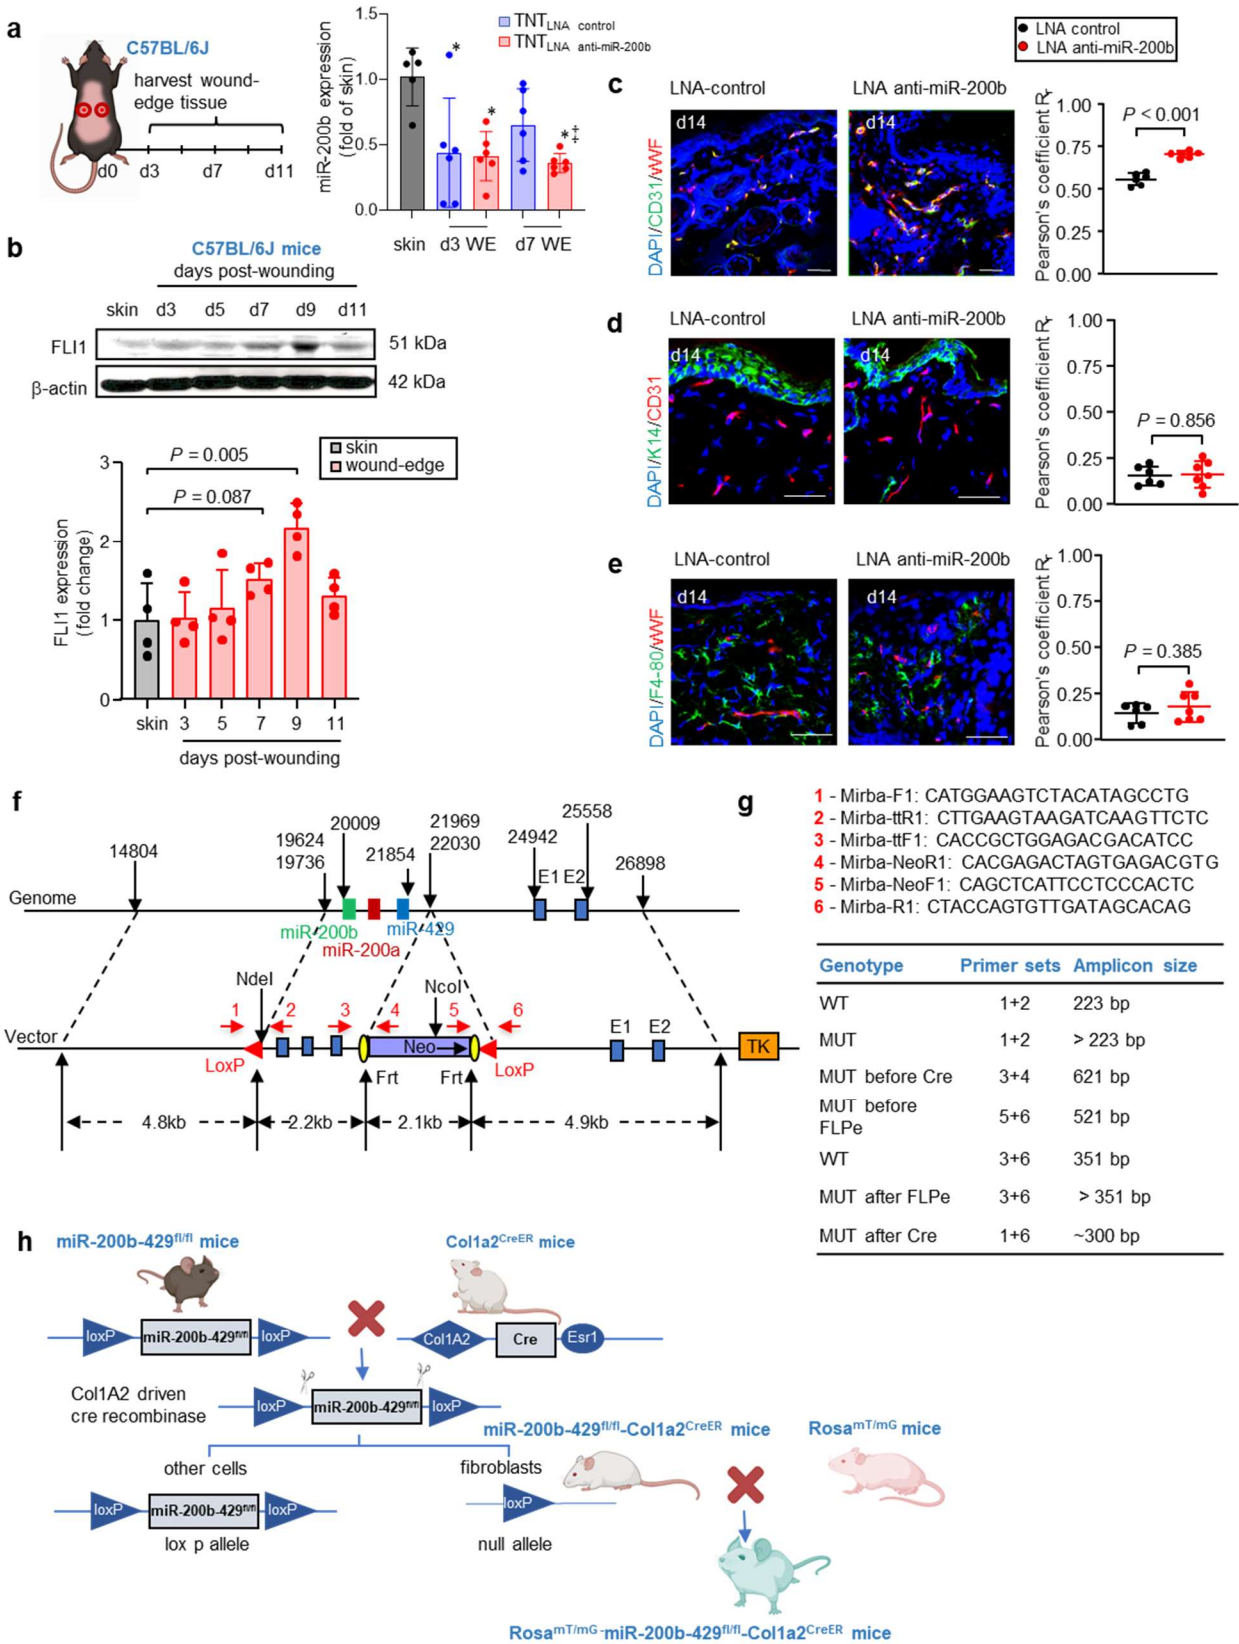

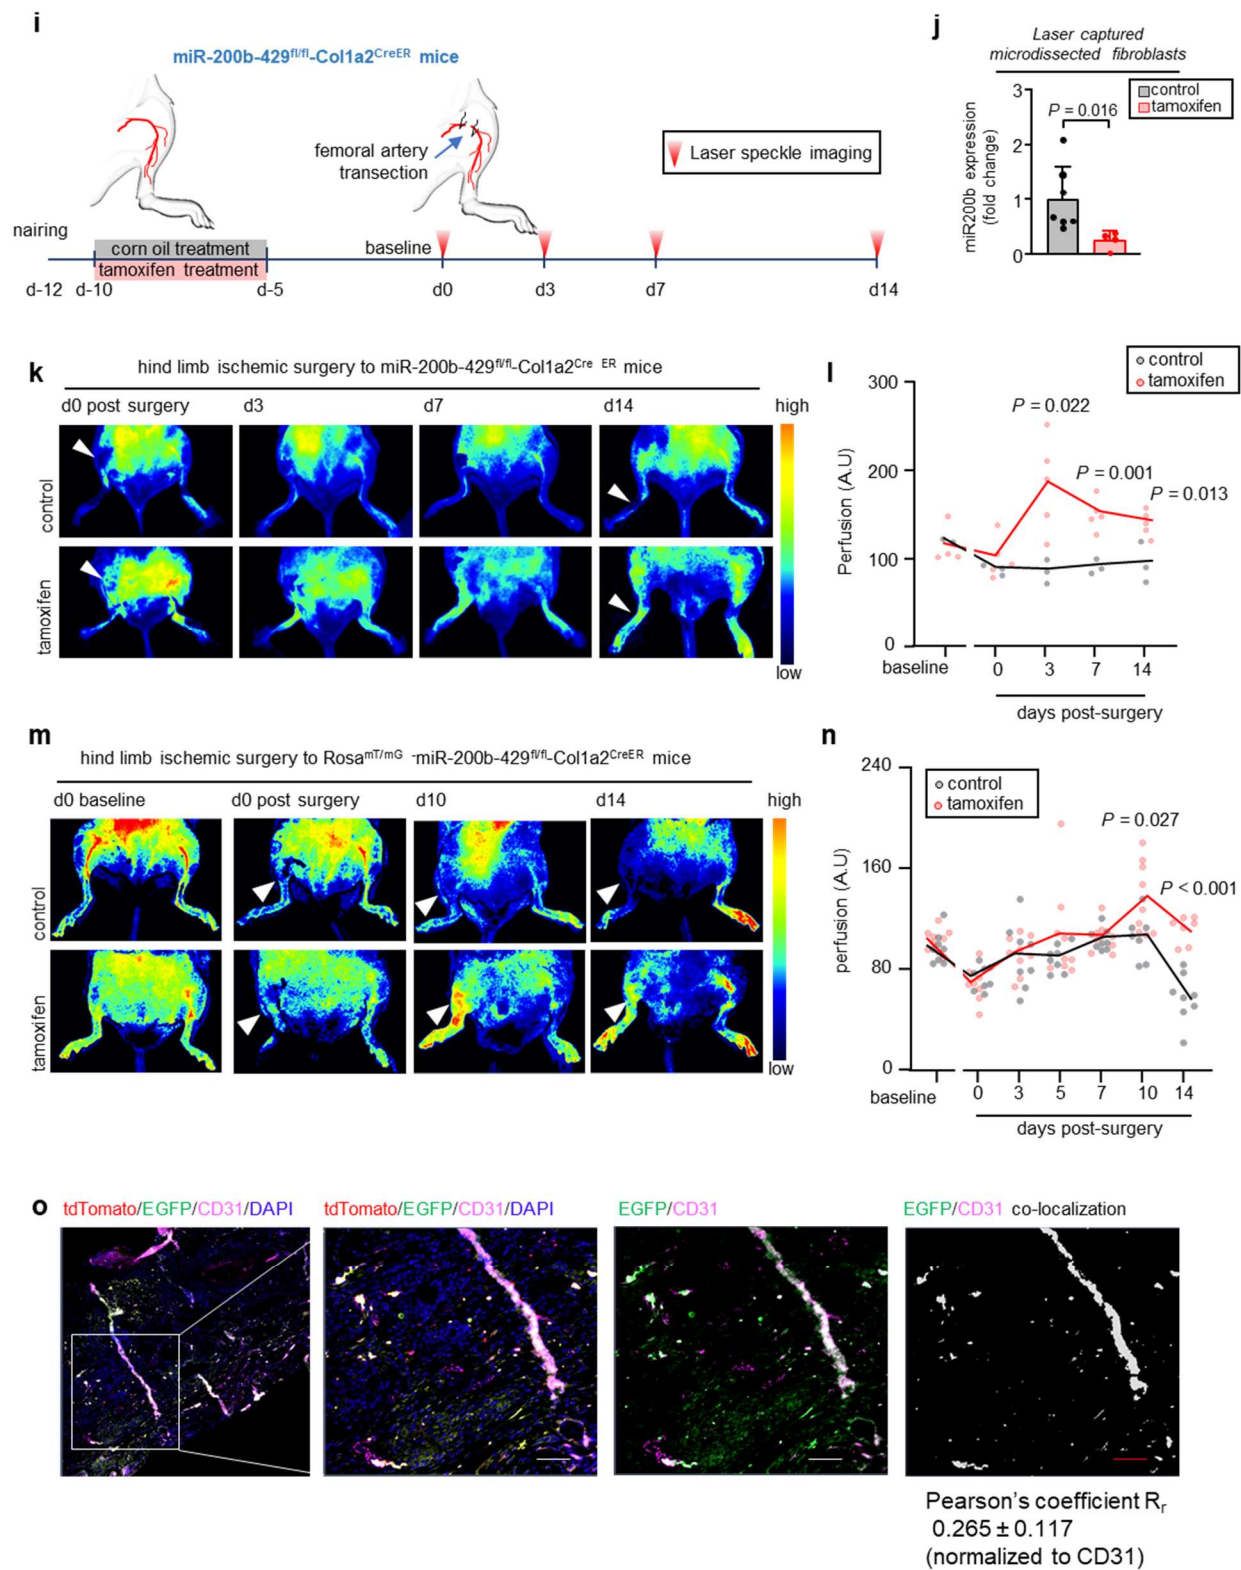

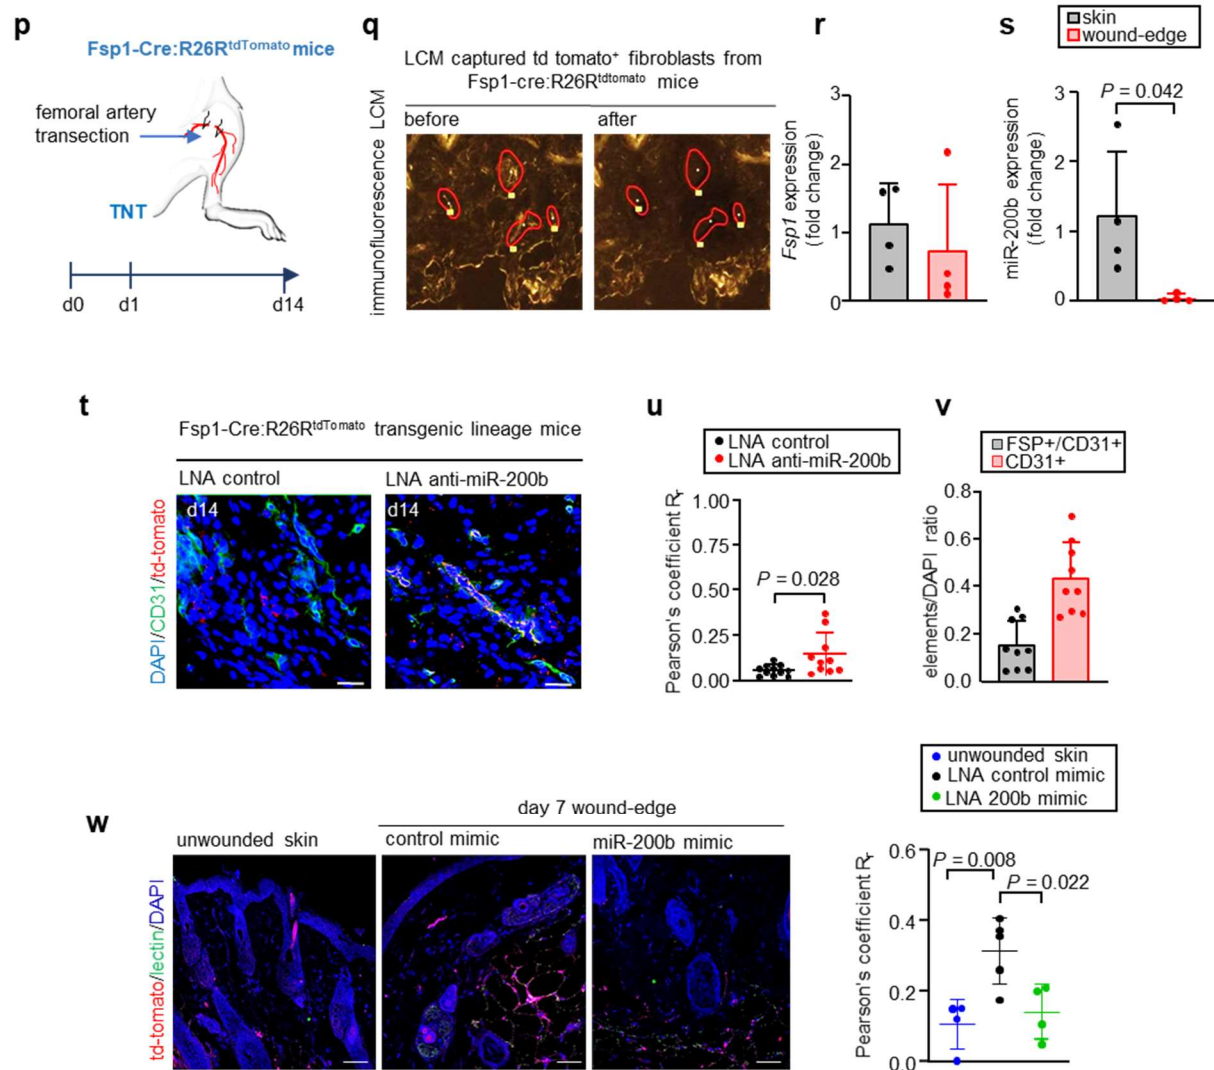

**Supplementary Fig. 7 | Increased wound angiogenesis by anti-miR200b-LNA delivery.**

**Related to Figure 6.** a) Schematic diagram showing collection of wound-edge (WE) tissue from and miR-200b expression in skin and WE tissue of C57BL/6 mice treated with either LNA control and LNA anti-miR 200b inhibitor at day 3 and day 7. Data expressed as mean  $\pm$  S.D. (n = 5-6). \*  $P < 0.05$  vs skin; ‡  $P < 0.05$  vs day 7 TNT<sub>LNA control</sub>. b) FLI1 expression and densitometric quantification (bottom) of FLI1 post-wounding days in wound-edge tissue of C57BL/6 mice.  $\beta$ -actin serves as a loading control. Results represent mean  $\pm$  S.D. (n = 4). c) Immunofluorescence

confocal images of hind-limb ischemic skin section (left) and colocalization quantitation (right) of CD31 (green) and vWF (red) staining of anti-miR200b LNA treated C57BL/6 mice vs control LNA treated mice. Results represent mean  $\pm$  S.D. (n = 6). Scale, 50 $\mu$ m. d) Immunofluorescence image of hind-limb ischemic skin section (left) and colocalization quantitation (right) of K14 (green) and red CD31 (red) staining of anti-miR200b LNA treated C57BL/6 mice vs control LNA treated mice. Results represent mean  $\pm$  S.D. (n = 6). Scale, 50 $\mu$ m. e) Immunofluorescence confocal image of hind-limb ischemic skin section (left) and colocalization quantitation (right) of F4/80 (green) macrophage marker and vWF (red) staining of anti-miR200b LNA treated C57BL/6 mice vs control LNA treated mice. Results represent mean  $\pm$  S.D. (n = 6-7). Scale, 50 $\mu$ m. f) Vector design for the generation of miR-200b-429<sup>fl/fl</sup> Col1a2<sup>creER</sup> mice. g) Primers and amplicon size used in the genotyping of miR-200b-429<sup>fl/fl</sup> Col1a2<sup>creER</sup> mice. h) Schematic diagram showing the breeding plan of miR-200b-429<sup>fl/fl</sup> Col1a2<sup>creER</sup> and ROSA<sup>mT/mG</sup> miR-200b-429<sup>fl/fl</sup> Col1a2<sup>creER</sup> mice. i) Schematic diagram of hind-limb (HL) surgery experiment in miR-200b-429<sup>fl/fl</sup> Col1a2<sup>creER</sup> mice. j) The abundance of miR-200b in fibroblasts post-tamoxifen application was shown graphically. Results represent mean  $\pm$  S.D. (n = 7,4). k-l) Representative laser speckle perfusion images (k) and quantification (l) of corn-oil treated (top) and tamoxifen treated (bottom) in miR-200b-429<sup>fl/fl</sup> Col1a2<sup>CreER</sup> mice at different time points post-surgery. The lines represent the mean, and the dots represent the individual value. (n = 3,5). m-n) Representative laser speckle perfusion images (k) and quantification (l) of corn-oil treated (top) and tamoxifen treated (bottom) in ROSA<sup>mT/mG</sup> miR-200b-429<sup>fl/fl</sup> Col1a2<sup>creER</sup> mice at different time points post-surgery. The lines represent the mean, and the dots represent the individual value. (n = 8). o) Colocalization of CD31 and EGFP was determined by Pearson correlation (r). (n = 5) p) Schematic diagram of hind-limb (HL) surgery experiment in FSP-1 cre mice. q-s) FSP1 and miR-200b expression in dermal fibroblast-rich skin

and wound-edge tissue of FSP1-cre mice collected by Laser Captured Microdissection (LCM). Results represent mean  $\pm$  S.D. (n = 4). t) Immunofluorescence confocal image of day 14 wound-edge tissue in FSP1-cre mice stained for CD31. Scale, 50  $\mu$ m. u) Colocalization of CD31 and td-tomato was determined by Pearson correlation (r). Data expressed as mean  $\pm$  S.D. (n = 10). v) The CD31 and td-tomato colocalized vascular elements were quantified in FSP1-cre mice and plotted graphically. Data expressed as mean  $\pm$  S.D. (n = 9) w) Colocalization of CD31 and td-tomato in unwounded skin and day 7 wound-edge transfected with control or miR-200b mimic was determined by Pearson correlation (r). Data expressed as mean  $\pm$  S.D. (n = 4-5). Fig. S7a, S7h, S7i and S7p were created with BioRender.com. Data in a, c, d, e, j, l, n, r, s, u and v were analyzed by two-tailed unpaired Student's t test. Data in b and c were analyzed by one-way analysis of variance with the *post-hoc* Bonferroni multiple comparison test.



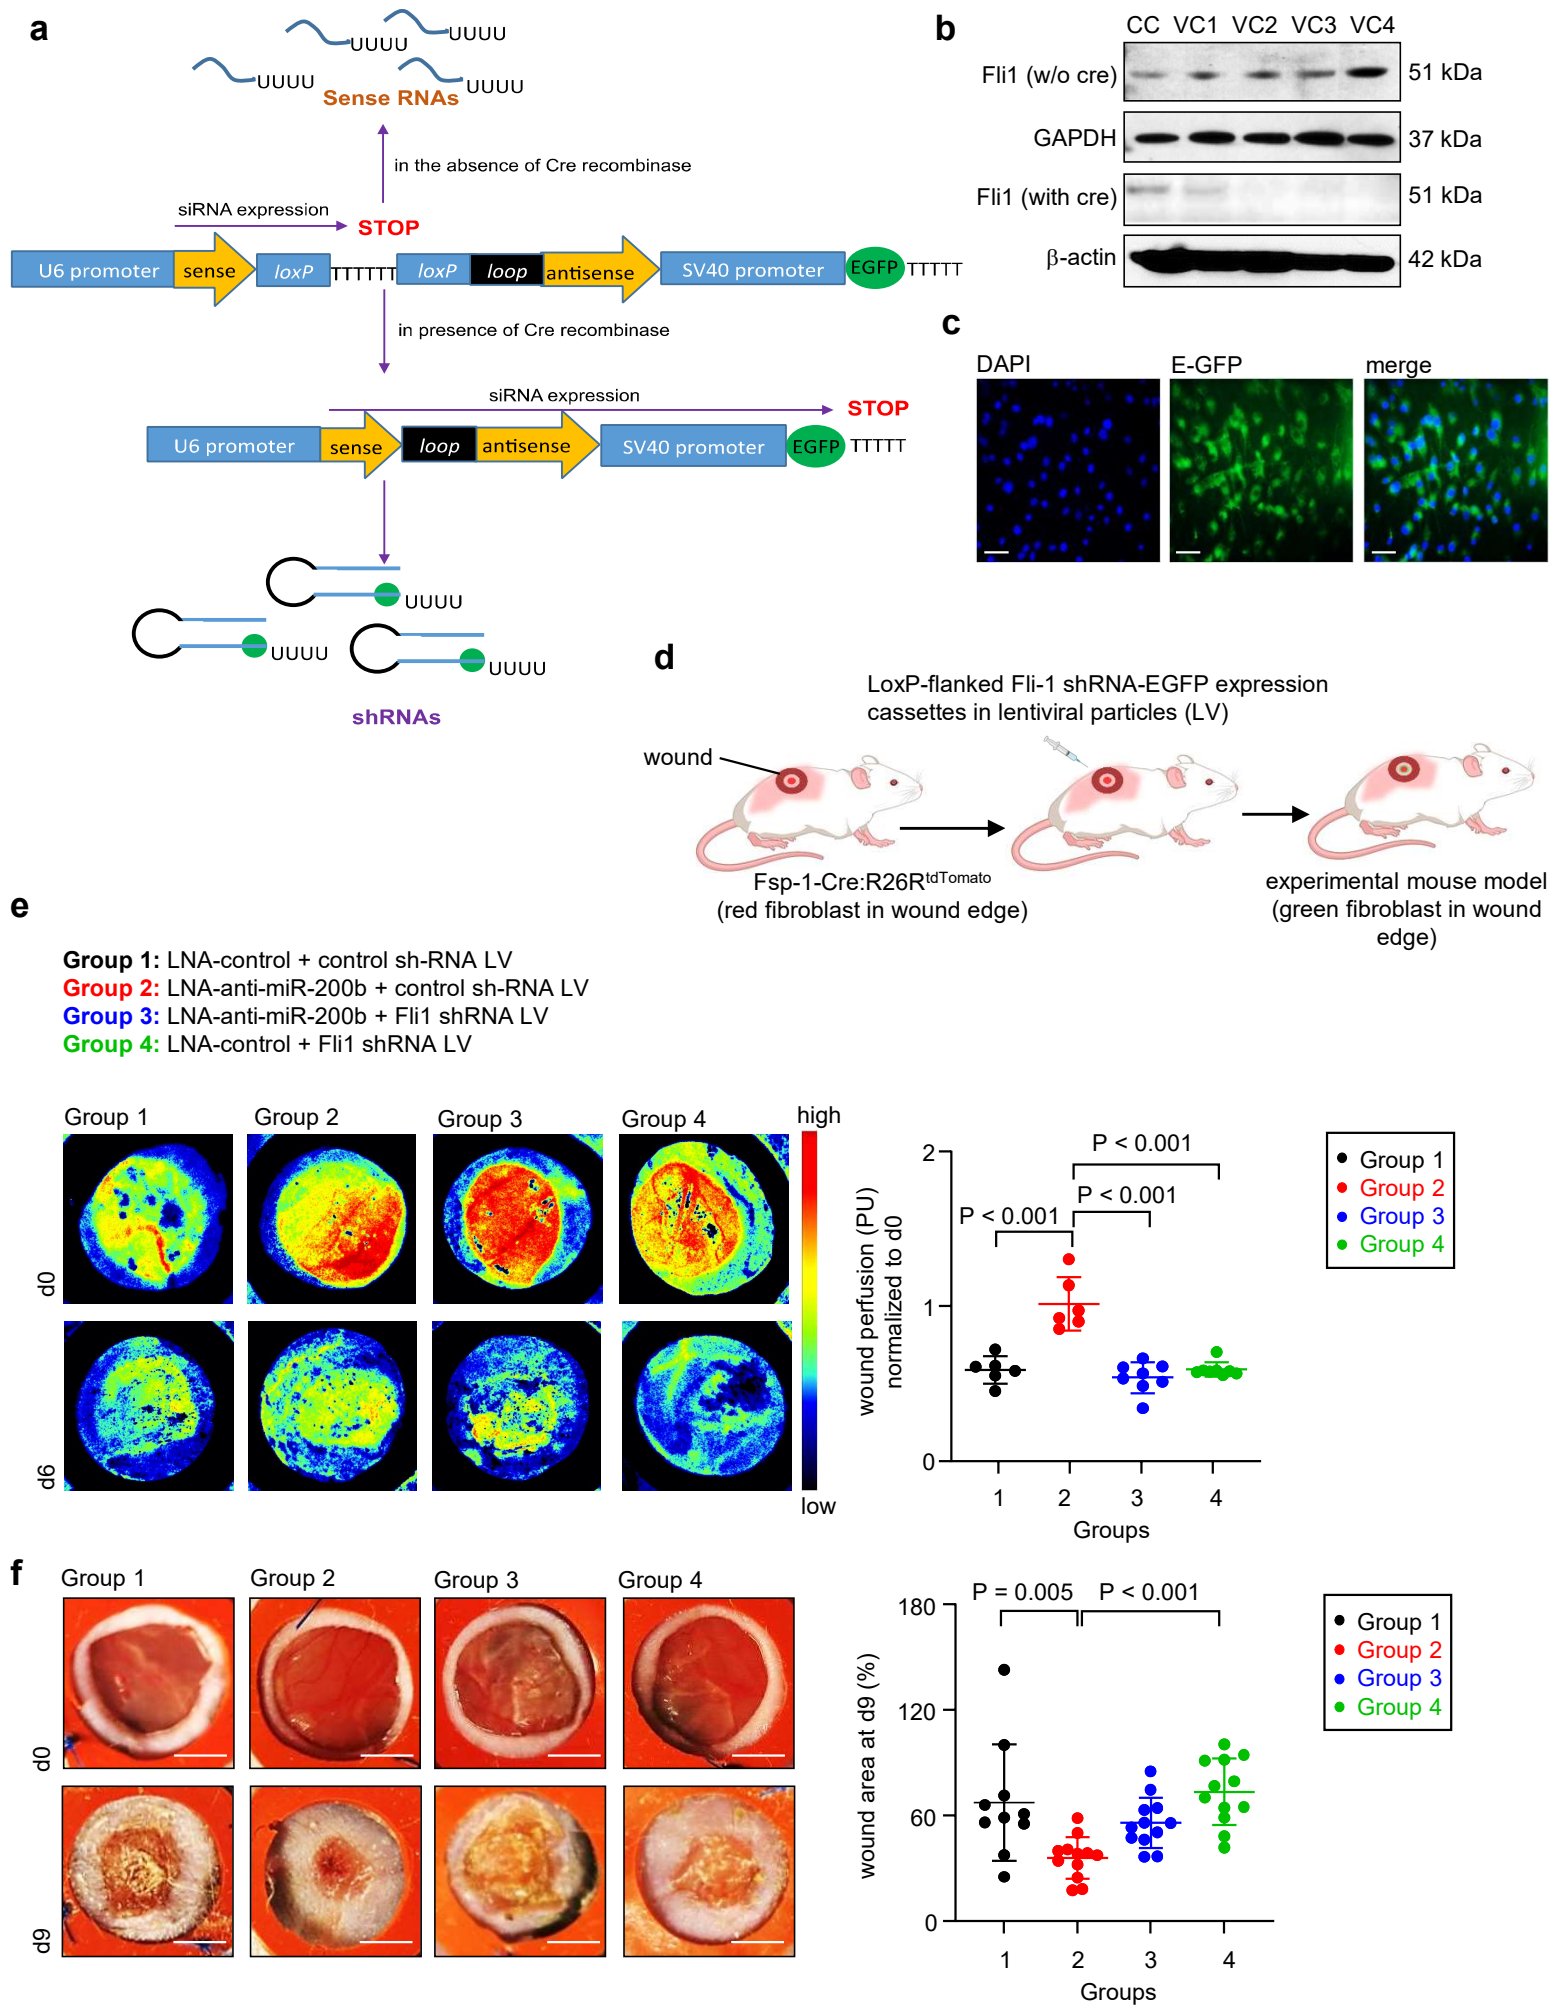



**Supplementary Fig. 8 | FLI 1 involvement for direct *in vivo* reprogramming of dermal fibroblasts into vasculogenic fibroblasts.** a) Schematic diagram showing Cre loxP regulated fibroblast specific Fli 1 shRNA expression. b) Four different FLI1 shRNA vectors were validated in dermal fibroblasts without and with Cre mediated deletion of the STOP cassette. Western blot analysis showing FLI1 protein expression in cells co-transfected with cre recombinase vector (pCSCre2) and each of four different FLI1 shRNA expression cassettes. CC, control shRNA construct and VC, lentiviral FLI1 shRNA constructs. c) Representative image showing E-GFP fluorescence in HADF-Cre cells transfected with LoxP flanked FLI1 shRNA expression cassettes. Scale, 100µm. d) Diagrammatic view of study design for targeted knocking down of FLI 1 at wound edge fibroblasts. e) Representative cutaneous blood perfusion images and quantification at day 6 wound-edge tissue of Fsp<sup>cre</sup>tdTomato mice treated with either LNA-control or LNA-anti-miR-200b inhibitor in absence or presence of control or Fli1 sh-RNA lentiviral particles. Scale, 2mm. (n = 6) f) Digital photograph of Fsp<sup>cre</sup>tdTomato mice wound-edge tissue at day 9 treated with either LNA-control or LNA-anti-miR-200b inhibitor in absence or presence of control or Fli1 sh-RNA lentiviral particles. Scale, 2mm. (n = 9-12). Fig. S8d created with BioRender.com. Data in e and f were analyzed by one-way analysis of variance with the *post-hoc* Bonferroni multiple comparison test.

**a**

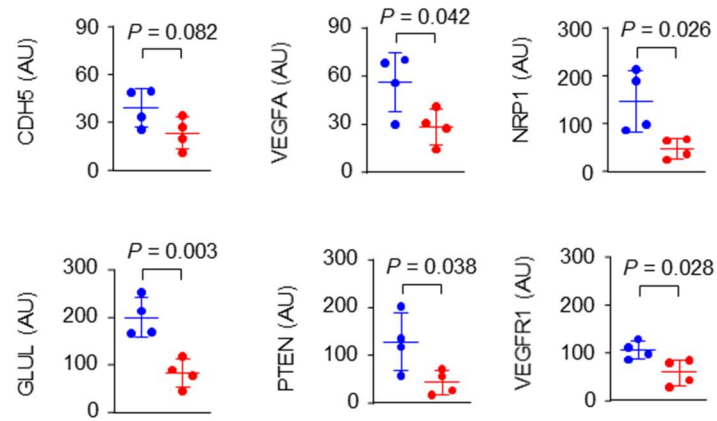

**b**

Table 1: Demographics and clinical characteristics of chronic wound patients

| Characteristics    | Non-Diabetic (n=10) | Diabetic (n=12)  |
|--------------------|---------------------|------------------|
| Age <sup>§</sup>   | 59 (48-78)          | 65 (48-79)       |
| Race <sup>†</sup>  |                     |                  |
| White              | 6                   | 6                |
| African American   | 1                   | 3                |
| Not reported*      | 3                   | 3                |
| Sex                |                     |                  |
| Male               | 6                   | 8                |
| Female             | 1                   | 2                |
| Not reported*      | 3                   | 2                |
| HbA1c <sup>§</sup> | 5.35 (5.2 - 5.5)    | 9.2 (5.4 - 13.1) |
| Wound Location     |                     |                  |
| Foot               | 2                   | 10               |
| Ischium            | 6                   |                  |
| Sacrum             | 1                   |                  |
| Not reported*      | 1                   | 2                |

<sup>§</sup> Data reported as median.

<sup>†</sup> Race was reported by patients

\* Surgically discarded and de-identified samples

**Supplementary Fig. 9 | Quantification of imaging mass cytometry data and demographics of human subjects.** a) The Imaging mass cytometry data exported from the MCD viewers were quantified in ImageJ software and plotted graphically as mean  $\pm$  S.D. (n=4) b) Table showing the age, race, sex, HbA1c and wound locations of human wound samples used in the study. Data in a, were analyzed by two-tailed unpaired Student's t test.

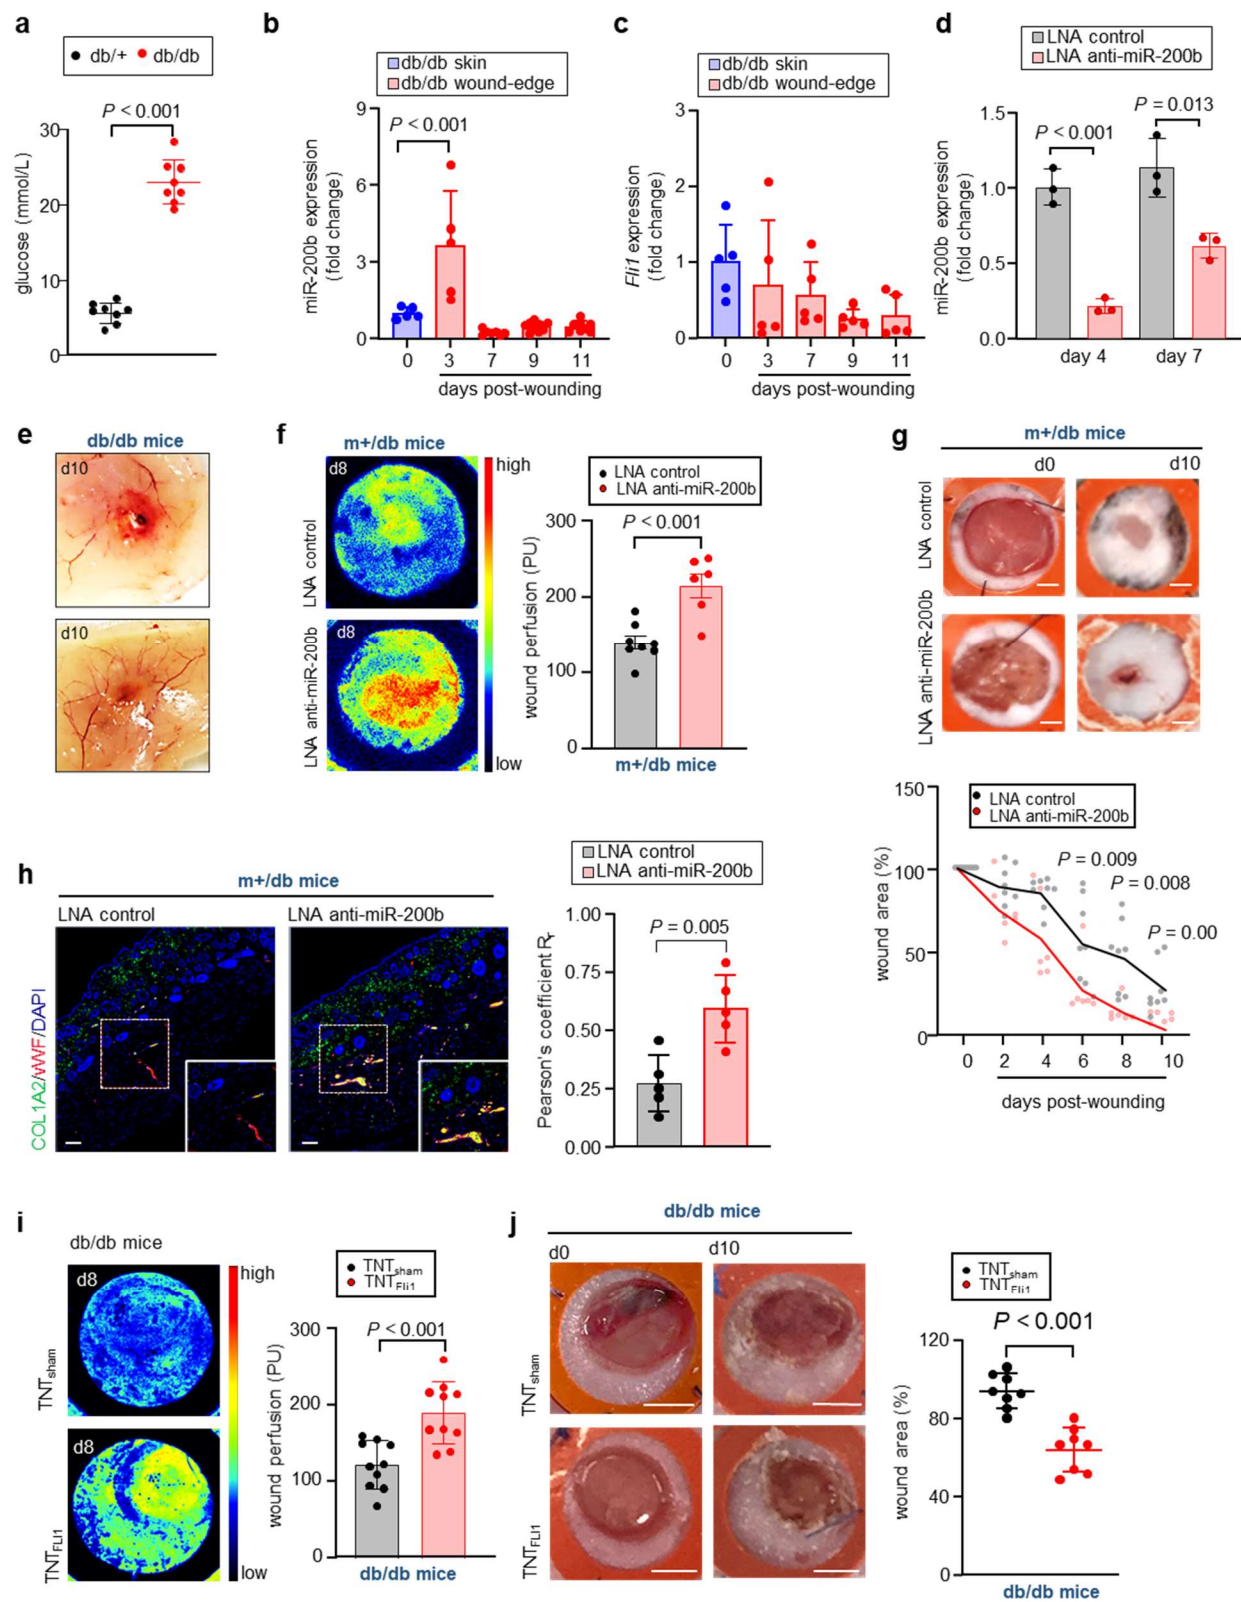

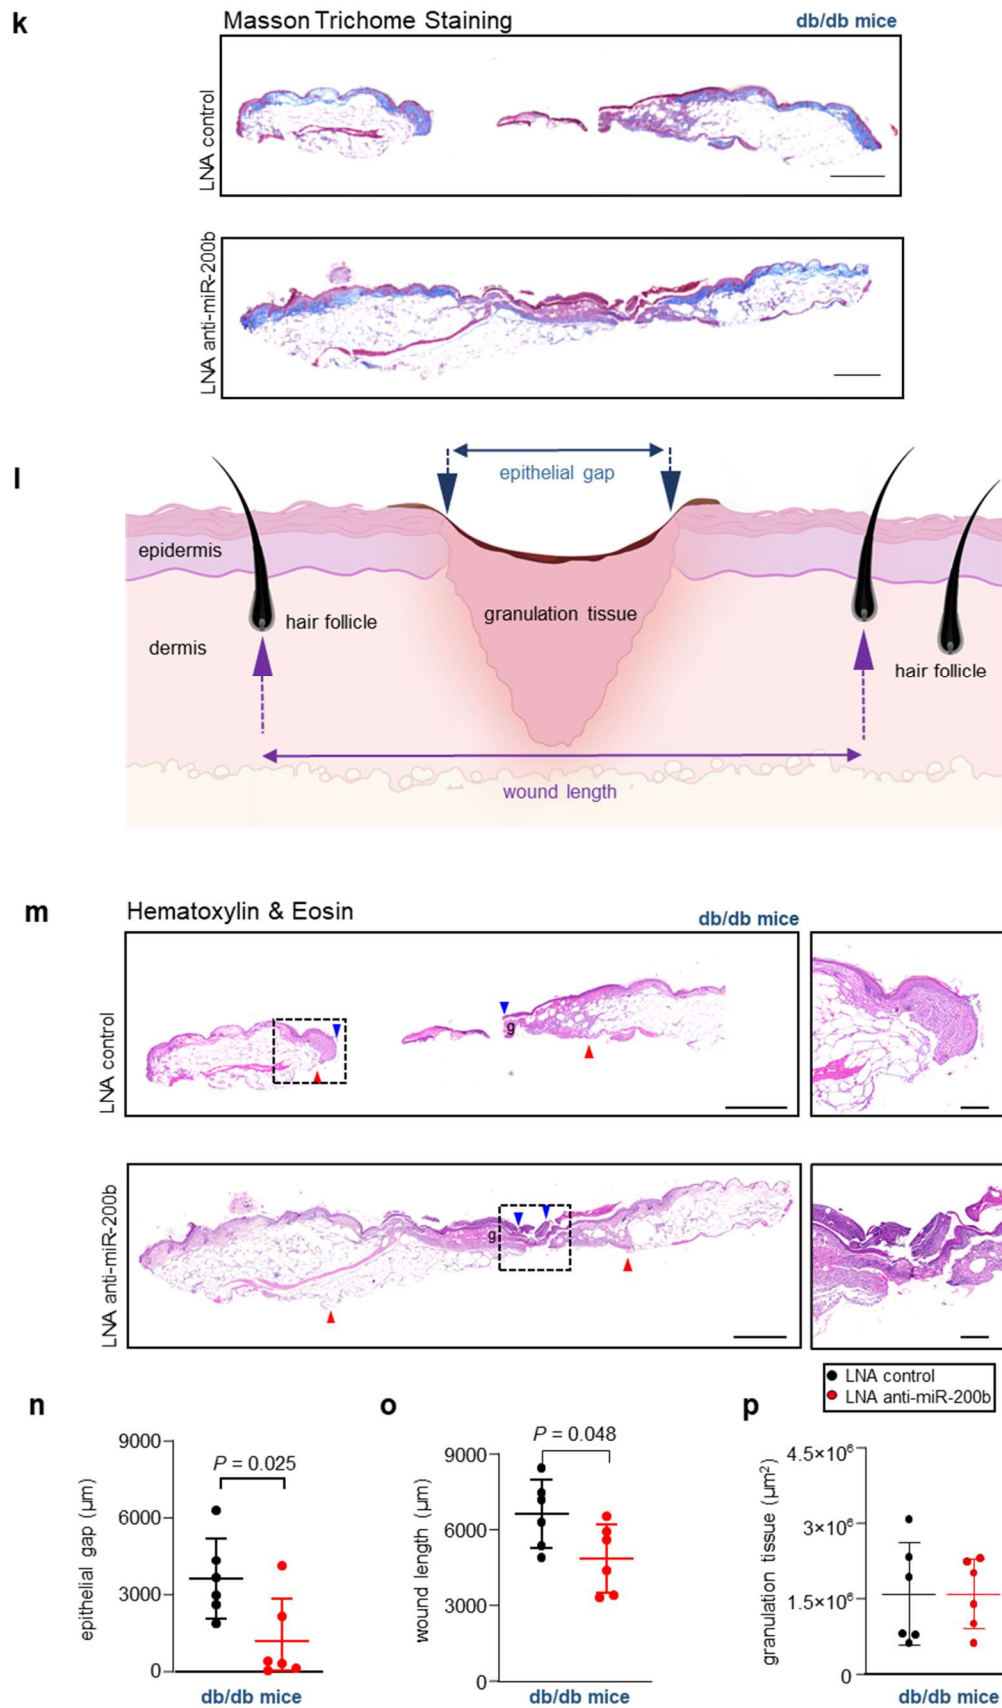

**Supplementary Fig. 10 | Administration of anti-miR-200b-LNA attenuates impairment of wound healing in db/db mice.** a) Blood glucose level in non-diabetic (db/+) and diabetic (db/db) mice. (n = 8). b-c) miR-200b (b) and Fli1 expression (c) in skin and WE tissue of db/db mice. (n = 5-9). d) miR-200b expression at d4 and d7 WE tissue of db/db mice treated with either LNA<sub>control</sub> or LNA<sub>anti-miR-200b</sub> inhibitor. (n = 3). e) Wound vasculature of LNA<sub>control</sub> or LNA<sub>anti-miR-200b</sub> inhibitor treated db/db skin at d10. f) Cutaneous blood perfusion images and quantification at d8 WE tissue of db/db mice treated with either LNA<sub>control</sub> or LNA<sub>anti-miR-200b</sub> inhibitor. (n= 6) g) Digital photograph of m+/db mice WE tissue at d0 and d10 treated with either LNA<sub>control</sub> or LNA<sub>anti-miR-200b</sub> inhibitor. Scale, 5 mm. Digital planimetry of the wound area was quantified and plotted graphically. (n=6). h) Immunofluorescence confocal image of d10 WE tissue in m+/db mice stained for COL1A2 and vWF. Colocalization of COL1A2 and vWF was determined by Pearson correlation (r). (n = 5). i) Representative cutaneous blood perfusion images and quantification at d8 WE tissue of db/db mice treated with either control or Fli1 over expressing plasmids. (n= 6) j) Digital photograph of db/db mice WE tissue at day 0 and day 10 treated with either control or Fli1 over expressing plasmids. Scale, 5 mm. (n=10) Digital planimetry of the wound area was quantified and plotted graphically. (n=6-8). k) Masson trichrome staining of day 10 wound-edge tissue in db/db mice treated with either LNA<sub>control</sub> or LNA<sub>anti-miR-200b</sub> inhibitor. Scale, 1000  $\mu$ m. (n = 6). l) Schematic diagram showing the wound-section showing the regions used for analytical histology. d, dermis; e, epidermis, g, granulation tissue; he, hyperproliferative epithelium; hf, hair follicle. m) Representative H&E staining of d10 wounds of db/db mice treated with either LNA<sub>control</sub> or LNA<sub>anti-miR-200b</sub> inhibitor. Scale, 1000  $\mu$ m. (n = 6). n-p) Morphometric analysis showing epithelial gap (n), wound-length (o) and granulation tissue area (p) in db/db mice treated with either LNA<sub>control</sub> or LNA<sub>anti-miR-200b</sub> inhibitor. (n=6) All data were shown as mean  $\pm$  S.D. Fig.



S10l created with BioRender.com Data in a, d, f, g, h, i, j, n, o and p were analyzed by two-tailed unpaired Student's t test. Data in b and c were analyzed by one-way analysis of variance with the *post-hoc* Bonferroni multiple comparison test.

## Supplementary Table 1

### List of primers used in this study

| Primer Name | Primer Sequence                  |
|-------------|----------------------------------|
| H_FLI1_F    | 5'-GGGCTGGGCTGCAGACTTGG-3'       |
| H_FLI1_R    | 5'-GGGGCTGCCCCGTAGTCAGGA-3'      |
| H_S100A4_F  | 5'-TCTTGGTTTGATCCTGACTGCT-3'     |
| H_S100A4_R  | 5'-TCGTTGTCCCTGTTGCTGTC-3'       |
| H_VEGFB_F   | 5'-AGCACCAAGTCCGGATG -3'         |
| H_VEGFB_R   | 5'-GTCTGGCTTCACAGCACTG -3'       |
| H_COL1A2_F  | 5'-GAGGGCAACAGCAGGTTCACTTA-3'    |
| H_COL1A2_R  | 5'-TCAGCACCAACCGATGTCCAA-3'      |
| H_18S_F     | 5'-GTAACCCGTTGAACCCCAT-3'        |
| H_18S_R     | 5'-CCATCCAATCGGTAGTAGCG-3'       |
| H_VWF_F     | 5'-CTGGCAGCTGTTCTTATGTCCTATT-3'  |
| H_VWF_R     | 5'-CTCATGCATGATGGCACCATAA-3'     |
| H_CD31_F    | 5'-AAATGCTCTCCCAGCCCAGGAT-3'     |
| H_CD31_R    | 5'-GCAACACACTGGTATTTCGACGTCTT-3' |

## Supplementary Table 2

List of vasculogenic genes in different subcluster of cluster 1 (Figure 4B) selected for RT2 PCR study

| Gene_<br>name    | Subclusters |       |       |      |       | Vasculature development |
|------------------|-------------|-------|-------|------|-------|-------------------------|
|                  | A           | B     | C     | D    | E     |                         |
| <i>JUNB</i>      | -0.42       | -0.41 | -0.44 | 0.41 | -0.35 | Yes                     |
| <i>ANXA2</i>     | 0.55        | 0.39  | -0.08 | 0.32 | 0.37  | Yes                     |
| <i>MAP2K1</i>    | -0.17       | -0.12 | -0.29 | 0.10 | -0.06 | Yes                     |
| <i>GLUL</i>      | -0.32       | -0.21 | -0.97 | 0.25 | -0.53 | Yes                     |
| <i>ACTA2</i>     | 0.03        | 0.04  | -0.23 | 0.23 | -0.12 | Yes                     |
| <i>ADM</i>       | -0.74       | -0.68 | -0.78 | 0.17 | -0.64 | Yes                     |
| <i>CDC42</i>     | -0.25       | -0.10 | -0.56 | 0.06 |       | Yes                     |
| <i>EFEMP2</i>    |             | 0.42  | 0.31  | 0.22 |       | Yes                     |
| <i>MMP14</i>     | -0.74       | -0.14 | -0.57 | 0.09 | -0.67 | Yes                     |
| <i>TNFRSF12A</i> | -0.96       | -0.63 | -1.07 | 0.14 | -0.49 | Yes                     |
| <i>THY1</i>      | -0.07       |       | 0.05  | 0.33 | -0.26 | Yes                     |
| <i>NAXE</i>      | 0.10        | 0.02  | -0.10 | 0.26 |       | Yes                     |
| <i>FOSL1</i>     | -0.55       | -0.49 | -0.60 | 0.08 | -0.48 | Yes                     |
| <i>TMEM204</i>   | -0.05       | 0.01  | -0.05 | 0.28 | -0.10 | Yes                     |
| <i>CLIC4</i>     |             | 0.39  | -0.17 | 0.28 |       | Yes                     |
| <i>CIB1</i>      | 0.20        | 0.30  | -0.25 | 0.29 |       | Yes                     |
| <i>HIF1A</i>     | -1.23       | -0.69 | -1.62 | 0.16 | -0.98 | Yes                     |
| <i>VEZF1</i>     | -0.19       | -0.19 | -0.27 | 0.08 | -0.14 | Yes                     |
| <i>LAMA4</i>     | -0.66       |       | -0.62 | 0.25 | -0.61 | Yes                     |
| <i>AKT1</i>      | 0.15        | 0.07  | -0.02 | 0.11 |       | Yes                     |
| <i>EPAS1</i>     | 0.03        | 0.04  | 0.01  | 0.05 | -0.04 | Yes                     |
| <i>HAND2</i>     | -0.14       | -0.10 | -0.21 | 0.15 | -0.02 | Yes                     |
| <i>TGFBI</i>     | -0.06       |       |       | 0.10 |       | Yes                     |
| <i>AAMP</i>      | -0.17       | -0.07 | -0.37 | 0.09 | -0.05 | Yes                     |
| <i>VEGFA</i>     | -0.20       | -0.19 | -0.23 | 0.03 | -0.15 | Yes                     |
| <i>VEGFB</i>     | 0.36        | 0.27  | 0.59  | 0.17 |       | Yes                     |

**Supplementary Table 3**

Gene sets used to calculate fibrosis and mechanotransduction score in cells subjected to miR-200b inhibition

| <b>genes used for computing<br/>fibrosis score</b> | <b>genes used for computing<br/>mechanotransduction score</b> |
|----------------------------------------------------|---------------------------------------------------------------|
| AGT                                                | ABL1                                                          |
| AGTR1                                              | ABL2                                                          |
| AKT1                                               | ACTA1                                                         |
| ALOX12                                             | ACTA2                                                         |
| BLMH                                               | ACTB                                                          |
| BRCA1                                              | ACTC1                                                         |
| BRCA2                                              | ACTG1                                                         |
| CASP1                                              | ACTG2                                                         |
| CASP3                                              | ACTN1                                                         |
| CAV1                                               | ACTN2                                                         |
| CCL2                                               | ACTN3                                                         |
| CCL7                                               | ACTN4                                                         |
| CD109                                              | ACTR2                                                         |
| CD19                                               | ACTR3                                                         |
| CD226                                              | AJUBA                                                         |
| CD40                                               | AKT1                                                          |
| CNR1                                               | AKT2                                                          |
| COL1A1                                             | AKT3                                                          |
| COL7A1                                             | AMOT                                                          |
| CSF3                                               | ANLN                                                          |
| CTGF                                               | ARF1                                                          |
| CTNNB1                                             | ARF3                                                          |
| CX3CL1                                             | ARF4                                                          |
| CX3CR1                                             | ARF5                                                          |
| CXXC5                                              | ARF6                                                          |
| DGKA                                               | ARHGAP1                                                       |
| DKK1                                               | ARHGAP12                                                      |
| DPT                                                | ARHGAP26                                                      |
| DSP                                                | ARHGAP35                                                      |
| EN1                                                | ARHGAP4                                                       |
| FAAH                                               | ARHGAP5                                                       |
| FBN1                                               | ARHGAP6                                                       |
| FBR3                                               | ARHGAP9                                                       |
| FGF7                                               | ARHGEF1                                                       |
| FLI1                                               | ARHGEF11                                                      |
| FN1                                                | ARHGEF12                                                      |
| FOSL2                                              | ARHGEF7                                                       |
| FOXP3                                              | ARPC1A                                                        |
| GATA1                                              | ARPC1B                                                        |
| GNAS                                               | ARPC2                                                         |
| GSK3B                                              | ARPC3                                                         |
| HAX1                                               | ARPC4                                                         |
| HIF1A                                              | ARPC5                                                         |

HPS1  
HPS4  
HPS5  
HSP90AB1  
ICAM1  
IL1RN  
ITGAV  
ITGB1  
ITGB3  
JUN  
KLF5  
LAMP1  
LEP  
LOXL2  
LSP1  
MFAP5  
MMP1  
MMP14  
MMP2  
MMP9  
NOTCH1  
NOX4  
NR1H2  
NR1H3  
NR4A1  
PANX1  
PDGFRA  
PDGFRB  
PDPK1  
PDZK1  
PLAUR  
PLOD2  
PNPLA2  
PPARD  
PPARG  
PTEN  
PTK2  
RBFox2  
REST  
RLN1  
RRP9  
S100A8  
S100A9  
SCNN1A  
SDC1  
SERPINF2  
SFRP1  
SIRT1  
SMAD1

ARPC5L  
ASAP1  
BAIAP2  
BCAR1  
BCAR3  
BRAF  
BTRC  
CAPN1  
CAPN10  
CAPN2  
CAPN3  
CAPN5  
CAPN7  
CAPN8  
CAPNS1  
CAV1  
CD44  
CDC42  
CDC42EP1  
CDC42EP2  
CDC42EP3  
CDC42EP4  
CDC42EP5  
CFL1  
CFL2  
CIT  
CRB1  
CRK  
CRKL  
CSNK1D  
CSNK1E  
CTTN  
CUL1  
DIRAS3  
DLC1  
DLG1  
DLG2  
DLG3  
DLG4  
DLG5  
DOCK1  
EPHA1  
ERAS  
EZR  
FAT4  
FNBP1  
FRMD6  
FYN  
GIT1

SMAD2  
SMAD3  
SMAD7  
SMO  
SPARC  
SPI1  
SPP1  
STAT3  
STAT4  
SYT7  
TBX21  
TGFB1  
TIMP1  
TNFSF14  
TNPO3  
TPH1  
TRIB3  
TSLP  
VDR  
VEGFA  
VEGFB  
WNK1

GNA12  
GNA13  
GRB2  
GRB7  
GSK3B  
GSN  
HRAS  
IGF1R  
ILK  
ILKAP  
ITCH  
ITGA1  
ITGA10  
ITGA11  
ITGA2  
ITGA2B  
ITGA3  
ITGA4  
ITGA5  
ITGA6  
ITGA7  
ITGA8  
ITGA9  
ITGAE  
ITGAL  
ITGAV  
ITGAX  
ITGB1  
ITGB2  
ITGB3  
ITGB4  
ITGB5  
ITGB7  
ITGB8  
KRAS  
KTN1  
LATS1  
LATS2  
LIMK1  
LIMK2  
LIMS1  
LLGL1  
LPAR1  
LPAR2  
LPAR3  
LPAR4  
LPAR6  
MAP2K1  
MAP2K2



MAP2K4  
MAP3K11  
MAPK1  
MAPK3  
MAPK8  
MOB1A  
MPRIP  
MRAS  
MSN  
MST1  
MYL12A  
MYL12B  
MYL3  
MYL4  
MYL5  
MYL6  
MYL6B  
MYL7  
MYL9  
MYLK  
MYLK2  
MYLK3  
MYLPF  
NCK1  
NCK2  
NEDD4  
NEDD9  
NF2  
NGEF  
NRAS  
NRP2  
PAK1  
PAK2  
PAK3  
PAK4

PAK6  
PARD3  
PARVA  
PARVB  
PATJ  
PFN1  
PFN2  
PFN3  
PFN4  
PI4KA  
PIEZO1  
PIK3C2A  
PIK3C2B  
PIK3C3

PIK3CA  
PIK3CB  
PIK3CD  
PIK3R1  
PIK3R2  
PIK3R3  
PIK3R4  
PIK3R6  
PIKFYVE  
PIP4K2A  
PIP4K2B  
PIP4K2C  
PIP5K1A  
PIP5K1B  
PIP5K1C  
PIP5KL1  
PKN1  
PLCG1  
PLCG2  
PLD1  
PLEKHG5  
PLXNA1  
PPM1J  
PPM1L  
PPP1CA  
PPP1CB  
PPP1CC  
PPP1R10  
PPP1R11  
PPP1R12A  
PPP1R12B  
PPP1R14A  
PPP1R14B  
PPP1R14C  
PPP1R3C  
PPP1R3D  
PPP1R7  
PPP2CA  
PPP2CB  
PPP2R1A  
PPP2R1B  
PPP2R2A  
PPP2R2C  
PPP2R3A  
PPP2R3B  
PPP2R5A  
PPP2R5B  
PPP2R5C  
PPP2R5D

PPP2R5E  
PTEN  
PTK2  
PTK2B  
PTPA  
PXN  
RAC1  
RAC2  
RAC3  
RAF1  
RALA  
RALB  
RAP1A  
RAP1B  
RAP2A  
RAP2B  
RAPGEF1  
RAPGEF2  
RAPGEF6  
RASD1  
RASSF1  
RASSF6  
RDX  
RHOA  
RHOB  
RHOBTB1  
RHOBTB2  
RHOC  
RHOD  
RHOF  
RHOG  
RHOH  
RHOJ  
RHOQ  
RHOT1  
RHOT2  
RHOU  
RHOV  
RHPN1  
RHPN2  
RND1  
RND2  
RND3  
ROCK1  
ROCK2  
RRAS  
RRAS2  
RTKN  
SAV1

SCRIB  
SEMA3F  
SFN  
SHC1  
SKP1  
SKP2  
SMAD1  
SMAD2  
SMAD3  
SMAD4  
SMAD5  
SOS1  
SOS2  
SRC  
STK3  
STK4  
TEAD1  
TEAD2  
TEAD3  
TEAD4  
TJP2  
TLN1  
TLN2  
TNK2  
TP53BP2  
TRPM7  
TRPM8  
TRPV4  
TSPAN1  
TSPAN2  
TSPAN3  
TSPAN4  
TSPAN5  
TSPAN6  
TSPAN7  
TTN  
VASP  
VCL  
WAS  
WASF1  
WASL  
WIPF1  
WWC1  
WWTR1  
YAP1  
YWHAB  
YWHAE  
YWHAG  
YWHAH

YWHAQ  
YWHAZ  
ZYX
